# Supplementary material for: Towards developing a criterion to characterize non-covalent bonds: a quantum mechanical study
Source: Royal Society of Chemistry journal article supplement (doi:10.1039/d0cp05689h), 2021-01-01
Supplement: d0cp05689h1.pdf [file d0cp05689h1.pdf]

## Supporting Information For

# Towards Developing a Quantitative Criterion to Characterize Non-covalent Bonds: A Quantum Mechanical Study

*Nandan Kumar<sup>1,2</sup>, Soumen Saha<sup>2,4</sup>, G. Narahari Sastry<sup>1,2,3,\*</sup>*

<sup>1</sup>Centre for Molecular Modeling, CSIR-Indian Institute of Chemical Technology, Tarnaka, Hyderabad 500007, Telangana State, India.

<sup>2</sup>Advanced Computation and Data Sciences, CSIR-North East Institute of Science and Technology, Jorhat, 785006, Assam, India.

<sup>3</sup>Academy of Scientific and Innovative Research (AcSIR), Ghaziabad, Uttar Pradesh- 201 002, India.

<sup>4</sup>Nagoya University, Furocho, Chikusa Ward, Nagoya, Aichi 464-8601, Japan.

***E-mail:*** [gnsastry@gmail.com](mailto:gnsastry@gmail.com)

## Contents

**Table S1:** Details of charge and multiplicity used in this study for the considered covalent, ionic, and coordinate systems.

**Table S2:** Details of charge and multiplicity used in this study for the considered non-covalent systems.

**Table S3:** Details of charge (I<sub>charge</sub>) and multiplicity (Mult) used in the LMO-EDA calculation for the considered covalent, ionic, and coordinate systems. M<sub>mult</sub> is the multiplicity for each moiety. Bond distance (BD) has been shown in Å.

**Table S4:** Details of charge (I<sub>charge</sub>) and multiplicity (Mult) used in the LMO-EDA calculation for the considered non-covalent systems. M<sub>mult</sub> is the multiplicity for each moiety. Bond distance (BD) has been shown in Å.

**Table S5:** Comparison of the calculated interaction energy of covalent, ionic, and coordinate bonds at MP2, B3LYP, and M05-2X from the corresponding CCSD(T) results. It also has shown the mean absolute value of the MP2, B3LYP, and M05-2X results from the corresponding CCSD(T) values. Energies in kcal/mol.

**Table S6:** Comparison of the calculated interaction energy at MP2, B3LYP, and M05-2X from the corresponding CCSD(T) results. It also has shown the mean absolute value of the MP2, B3LYP, and M05-2X results from the corresponding CCSD(T) values. Energies in kcal/mol.

**Table S7:** Calculated interaction energy (kcal/mol) at MP2 and the available experimental values<sup>142</sup> of interaction energy for covalent, ionic, and non-covalent bonds. All values are in kcal/mol.

**Table S8 (a):** Contribution of interaction energy components (kcal/mol) at MP2/6-311++G\*\* level using LMO-EDA approach for the covalent systems.

**Table S8 (b):** Contribution of interaction energy components (%) at MP2/6-311++G\*\* level using LMO-EDA approach for the covalent systems.

**Table S9 (a):** Contribution of interaction energy components (kcal/mol) at MP2/6-311++G\*\* level using LMO-EDA approach for the ionic systems.

**Table S9 (b):** Contribution of interaction energy components (%) at MP2/6-311++G\*\* level using LMO-EDA approach for the ionic systems.

**Table S10 (a):** Contribution of interaction energy components (kcal/mol) at MP2/6-311++G\*\* level using LMO-EDA approach for the coordinate systems.

**Table S10 (b):** Contribution of interaction energy components (%) at MP2/6-311++G\*\* level using LMO-EDA approach for the coordinate systems.

**Table S11 (a):** Contribution of interaction energy components (kcal/mol) at MP2/6-311++G\*\* level using LMO-EDA approach for the non-covalent systems.

**Table S11 (b):** Contribution of interaction energy components (in %) at MP2/6-311++G\*\* level using LMO-EDA approach for the non-covalent systems.

**Table S11 (c):** SAPT energy (kcal/mol) calculations at SAPT2+3(CCD)dmp2 using 6-311++G\*\* basis set are carried out with PSI4 for the non-covalent systems.

**Table S12:** The variation of electron density ( $\rho$ ), Laplacian of electron density ( $\nabla^2\rho$ ),  $H(\mathbf{r})$ , and  $G(\mathbf{r})/V(\mathbf{r})$  as obtained at a bond critical point for the covalent bonds, obtained at MP2, B3LYP, and M05-2X using 6-311++G\*\* basis set. These all values are given in a.u.

**Table S13:** The variation of electron density ( $\rho$ ), Laplacian of electron density ( $\nabla^2\rho$ ),  $H(\mathbf{r})$ , and  $G(\mathbf{r})/V(\mathbf{r})$  as obtained at a bond critical point for the ionic and coordinate bonds, obtained at MP2, B3LYP and M05-2X using 6-311++G\*\* basis set. These all values are given in a.u.

**Table S14:** The variation of electron density ( $\rho$ ), Laplacian of electron density ( $\nabla^2\rho$ ),  $H(\mathbf{r})$ , and  $G(\mathbf{r})/V(\mathbf{r})$  as obtained at a critical point for the non-covalent bonds, obtained at MP2, B3LYP and M05-2X using 6-311++G\*\* basis set. These all values are given in a.u.

**Table S15:** The variation of the absolute value of kinetic energy density  $G(\mathbf{r})$  and potential energy density  $V(\mathbf{r})$  at a critical point for the covalent, ionic, and coordinate bonds, obtained at MP2/6-311++G\*\* level of theory. These all values are given in a.u.

**Table S16:** The variation of kinetic energy density  $G(\mathbf{r})$  and potential energy density  $V(\mathbf{r})$  at a critical point for the non-covalent, obtained at MP2/6-311++G\*\* level of theory. These all values are given in a.u.

**Table S17.** The SAPT interaction energy decomposes into electrostatics (elst), exchange (exch), induction (ind), and dispersion (disp) components. The subscript “resp” denotes that the orbital response of the perturbed system is taken into account. The superscripts refer to the orders of the interaction and Møller-Plesset fluctuation potential operators.

**Figure S1 (a):** NCI surfaces with  $s=0.5$  a.u. of the covalent (1-24), ionic (25-33), and coordinate (34-42) bonded systems.

**Figure S1 (b):** NCI surfaces with  $s=0.5$  a.u. of the non-covalent bonded systems, namely HB (1-2), CHB (3-4), ML (5-6), XHP (7-11), LP (12), AP (13), CP (14), PP (15-16), CA (17-18), XB (19-22), HXB (23), CB (24-26), PB (27-28), CGB (29-30), TB (31-32), LB (33-35), VDW (36-38), HHB (39), DHB (40-41), and BB (42-43).

**Figure S2:** Linear fitting of interaction energy with electron density at a critical point for (a) covalent, (b) ionic, and (c) coordinate bonds. Values are calculated at MP2/6-311++G\*\* level of theory.

**Table S1:** Details of charge and multiplicity used in this study for the considered covalent, ionic, and coordinate systems.

| S. No.            | Covalent                                           | Charge | Multiplicity |
|-------------------|----------------------------------------------------|--------|--------------|
| 1.                | H <sub>2</sub>                                     | 0      | 1            |
| 2.                | N <sub>2</sub>                                     | 0      | 1            |
| 3.                | O <sub>2</sub>                                     | 0      | 3            |
| 4.                | Cl <sub>2</sub>                                    | 0      | 1            |
| 5.                | HF                                                 | 0      | 1            |
| 6.                | HCl                                                | 0      | 1            |
| 7.                | FCI                                                | 0      | 1            |
| 8.                | BH <sub>3</sub>                                    | 0      | 1            |
| 9.                | NH <sub>3</sub>                                    | 0      | 1            |
| 10.               | CH <sub>4</sub>                                    | 0      | 1            |
| 11.               | H <sub>2</sub> O                                   | 0      | 1            |
| 12.               | PH <sub>3</sub>                                    | 0      | 1            |
| 13.               | H <sub>2</sub> S                                   | 0      | 1            |
| 14.               | BCl <sub>3</sub>                                   | 0      | 1            |
| 15.               | NCl <sub>3</sub>                                   | 0      | 1            |
| 16.               | Cl <sub>2</sub> O                                  | 0      | 1            |
| 17.               | PCl <sub>3</sub>                                   | 0      | 1            |
| 18.               | SCl <sub>2</sub>                                   | 0      | 1            |
| 19.               | CCl <sub>4</sub>                                   | 0      | 1            |
| 20.               | C <sub>2</sub> H <sub>6</sub>                      | 0      | 1            |
| 21.               | C <sub>2</sub> H <sub>4</sub>                      | 0      | 1            |
| 22.               | C <sub>2</sub> H <sub>2</sub>                      | 0      | 1            |
| 23.               | CH <sub>3</sub> OH                                 | 0      | 1            |
| 24.               | CH <sub>3</sub> SH                                 | 0      | 1            |
| <b>Ionic</b>      |                                                    |        |              |
| 25.               | NaCl                                               | 0      | 1            |
| 26.               | LiH                                                | 0      | 1            |
| 27.               | NaH                                                | 0      | 1            |
| 28.               | KH                                                 | 0      | 1            |
| 29.               | CaS                                                | 0      | 1            |
| 30.               | AlN                                                | 0      | 1            |
| 31.               | MgCl <sub>2</sub>                                  | 0      | 1            |
| 32.               | MgH <sub>2</sub>                                   | 0      | 1            |
| 33.               | CaH <sub>2</sub>                                   | 0      | 1            |
| <b>Coordinate</b> |                                                    |        |              |
| 34.               | NH <sub>3</sub> -BH <sub>3</sub>                   | 0      | 1            |
| 35.               | NH <sub>3</sub> -BF <sub>3</sub>                   | 0      | 1            |
| 36.               | PH <sub>3</sub> -BH <sub>3</sub>                   | 0      | 1            |
| 37.               | PH <sub>3</sub> -AlH <sub>3</sub>                  | 0      | 1            |
| 38.               | H <sub>2</sub> S-BH <sub>3</sub>                   | 0      | 1            |
| 39.               | H <sub>2</sub> S-AlH <sub>3</sub>                  | 0      | 1            |
| 40.               | CO-BH <sub>3</sub>                                 | 0      | 1            |
| 41.               | (CH <sub>3</sub> )NH <sub>2</sub> -BH <sub>3</sub> | 0      | 1            |
| 42.               | HF-BH <sub>3</sub>                                 | 0      | 1            |

**Table S2:** Details of charge and multiplicity used in this study for the considered non-covalent systems.

| S. No. | Non-covalent                                     | Charge | Multiplicity | S. No. | Non-covalent                                      | Charge | Multiplicity |
|--------|--------------------------------------------------|--------|--------------|--------|---------------------------------------------------|--------|--------------|
| 1.     | H <sub>2</sub> O-H <sub>2</sub> O                | 0      | 1            | 23.    | LiH-ClCF <sub>3</sub>                             | 0      | 1            |
| 2.     | NH <sub>3</sub> -NH <sub>3</sub>                 | 0      | 1            | 24.    | C <sub>2</sub> H <sub>4</sub> -CH <sub>3</sub> CN | 0      | 1            |
| 3.     | NH <sub>3</sub> -NH <sub>4</sub> <sup>+</sup>    | 1      | 1            | 25.    | LiF-CH <sub>3</sub> F                             | 0      | 1            |
| 4.     | H <sub>2</sub> O-NH <sub>4</sub> <sup>+</sup>    | 1      | 1            | 26.    | H <sub>2</sub> O-CH <sub>3</sub> OH               | 0      | 1            |
| 5.     | H <sub>2</sub> O-Li <sup>+</sup>                 | 1      | 1            | 27.    | FH <sub>2</sub> P-NH <sub>2</sub> F               | 0      | 1            |
| 6.     | NH <sub>3</sub> -Li <sup>+</sup>                 | 1      | 1            | 28.    | FH <sub>2</sub> P-NH <sub>2</sub> Me              | 0      | 1            |
| 7.     | C <sub>2</sub> H <sub>2</sub> -HCN               | 0      | 1            | 29.    | F(Me)S-NH <sub>3</sub>                            | 0      | 1            |
| 8.     | C <sub>2</sub> H <sub>2</sub> -HNC               | 0      | 1            | 30.    | OH(Me)S-NH <sub>3</sub>                           | 0      | 1            |
| 9.     | NH <sub>3</sub> -C <sub>2</sub> H <sub>4</sub>   | 0      | 1            | 31.    | CN(H <sub>3</sub> )Si-CN(H <sub>3</sub> )Si       | 0      | 1            |
| 10.    | CH <sub>4</sub> -Bz                              | 0      | 1            | 32.    | NC(H <sub>3</sub> )Si-NC(H <sub>3</sub> )Si       | 0      | 1            |
| 11.    | NH <sub>3</sub> -Bz                              | 0      | 1            | 33.    | C <sub>2</sub> H <sub>4</sub> -LiF                | 0      | 1            |
| 12.    | H <sub>2</sub> O-CNBz                            | 0      | 1            | 34.    | H <sub>2</sub> O-LiF                              | 0      | 1            |
| 13.    | Cl <sup>-</sup> -FBz                             | -1     | 1            | 35.    | H <sub>3</sub> N-LiF                              | 0      | 1            |
| 14.    | Li <sup>+</sup> -Bz                              | 1      | 1            | 36.    | He <sub>2</sub>                                   | 0      | 1            |
| 15.    | Bz-Bz                                            | 0      | 1            | 37.    | Ne <sub>2</sub>                                   | 0      | 1            |
| 16.    | Pyridine-Bz                                      | 0      | 1            | 38.    | Ar <sub>2</sub>                                   | 0      | 1            |
| 17.    | Li <sup>+</sup> -C <sub>2</sub> H <sub>6</sub>   | 1      | 1            | 39.    | Propane <sub>2</sub>                              | 0      | 1            |
| 18.    | Li <sup>+</sup> -CH <sub>4</sub>                 | 1      | 1            | 40.    | DHB-Me                                            | 0      | 1            |
| 19.    | CH <sub>3</sub> NH <sub>2</sub> -I <sub>2</sub>  | 0      | 1            | 41.    | DHB-Et                                            | 0      | 1            |
| 20.    | (CH <sub>3</sub> ) <sub>3</sub> N-I <sub>2</sub> | 0      | 1            | 42.    | HBeCHN(H)-<br>Be(H)CHN(H)                         | 0      | 1            |
| 21.    | C <sub>2</sub> H <sub>2</sub> -ClCN              | 0      | 1            | 43.    | FBeCHN(H)-<br>Be(F)CHN(H)                         | 0      | 1            |
| 22.    | H <sub>3</sub> N-ClCN                            | 0      | 1            |        |                                                   |        |              |

**Table S3:** Details of charge (Icharg) and multiplicity (Mult) used in the LMO-EDA calculation for the considered covalent, ionic, and coordinate systems. Mmult is the multiplicity for each moiety. Bond distance (BD) has been shown in Å.

| S. No.            | Covalent                                           | Icharg | Mult | Mcharg | Mmult | BD    |
|-------------------|----------------------------------------------------|--------|------|--------|-------|-------|
| 1.                | H <sub>2</sub>                                     | 0      | 1    | 0, 0   | 2, -2 | 0.738 |
| 2.                | N <sub>2</sub>                                     | 0      | 1    | 0, 0   | 4, -4 | 1.120 |
| 3.                | O <sub>2</sub>                                     | 0      | 1    | 0, 0   | 3, -3 | 1.224 |
| 4.                | Cl <sub>2</sub>                                    | 0      | 1    | 0, 0   | 2, -2 | 2.025 |
| 5.                | HF                                                 | 0      | 1    | 0, 0   | 2, -2 | 0.917 |
| 6.                | HCl                                                | 0      | 1    | 0, 0   | 2, -2 | 1.273 |
| 7.                | FCl                                                | 0      | 1    | 0, 0   | 2, -2 | 1.673 |
| 8.                | BH <sub>3</sub>                                    | 0      | 1    | 0, 0   | 2, -2 | 1.191 |
| 9.                | NH <sub>3</sub>                                    | 0      | 1    | 0, 0   | 2, -2 | 1.014 |
| 10.               | CH <sub>4</sub>                                    | 0      | 1    | 0, 0   | 2, -2 | 1.091 |
| 11.               | H <sub>2</sub> O                                   | 0      | 1    | 0, 0   | 2, -2 | 0.959 |
| 12.               | PH <sub>3</sub>                                    | 0      | 1    | 0, 0   | 2, -2 | 1.409 |
| 13.               | H <sub>2</sub> S                                   | 0      | 1    | 0, 0   | 2, -2 | 1.333 |
| 14.               | BCl <sub>3</sub>                                   | 0      | 1    | 0, 0   | 2, -2 | 1.740 |
| 15.               | NCl <sub>3</sub>                                   | 0      | 1    | 0, 0   | 2, -2 | 1.768 |
| 16.               | OCl <sub>2</sub>                                   | 0      | 1    | 0, 0   | 2, -2 | 1.728 |
| 17.               | PCl <sub>3</sub>                                   | 0      | 1    | 0, 0   | 2, -2 | 2.058 |
| 18.               | SCl <sub>2</sub>                                   | 0      | 1    | 0, 0   | 2, -2 | 2.045 |
| 19.               | CCl <sub>4</sub>                                   | 0      | 1    | 0, 0   | 2, -2 | 1.772 |
| 20.               | C <sub>2</sub> H <sub>6</sub>                      | 0      | 1    | 0, 0   | 2, -2 | 1.530 |
| 21.               | C <sub>2</sub> H <sub>4</sub>                      | 0      | 1    | 0, 0   | 1, -1 | 1.339 |
| 22.               | C <sub>2</sub> H <sub>2</sub>                      | 0      | 1    | 0, 0   | 2, -2 | 1.216 |
| 23.               | CH <sub>3</sub> OH                                 | 0      | 1    | 0, 0   | 2, -2 | 1.423 |
| 24.               | CH <sub>3</sub> SH                                 | 0      | 1    | 0, 0   | 2, -2 | 1.812 |
| <b>Ionic</b>      |                                                    |        |      |        |       |       |
| 25.               | NaCl                                               | 0      | 1    | 1, -1  | 1, 1  | 2.381 |
| 26.               | LiH                                                | 0      | 1    | 1, -1  | 1, 1  | 1.600 |
| 27.               | NaH                                                | 0      | 1    | 1, -1  | 1, 1  | 1.908 |
| 28.               | KH                                                 | 0      | 1    | 1, -1  | 1, 1  | 2.245 |
| 29.               | CaS                                                | 0      | 1    | 2, -2  | 1, 1  | 2.369 |
| 30.               | AlN                                                | 0      | 1    | 3, -3  | 1, 1  | 1.640 |
| 31.               | MgCl <sub>2</sub>                                  | 0      | 1    | 1, -1  | 1, 1  | 2.181 |
| 32.               | MgH <sub>2</sub>                                   | 0      | 1    | 1, -1  | 1, 1  | 1.704 |
| 33.               | CaH <sub>2</sub>                                   | 0      | 1    | 1, -1  | 1, 1  | 2.050 |
| <b>Coordinate</b> |                                                    |        |      |        |       |       |
| 34.               | NH <sub>3</sub> -BH <sub>3</sub>                   | 0      | 1    | 0, 0   | 1, 1  | 1.656 |
| 35.               | NH <sub>3</sub> -BF <sub>3</sub>                   | 0      | 1    | 0, 0   | 1, 1  | 1.668 |
| 36.               | PH <sub>3</sub> -BH <sub>3</sub>                   | 0      | 1    | 0, 0   | 1, 1  | 1.941 |
| 37.               | PH <sub>3</sub> -AlH <sub>3</sub>                  | 0      | 1    | 0, 0   | 1, 1  | 2.561 |
| 38.               | H <sub>2</sub> S-BH <sub>3</sub>                   | 0      | 1    | 0, 0   | 1, 1  | 2.024 |
| 39.               | H <sub>2</sub> S-AlH <sub>3</sub>                  | 0      | 1    | 0, 0   | 1, 1  | 2.565 |
| 40.               | CO-BH <sub>3</sub>                                 | 0      | 1    | 0, 0   | 1, 1  | 1.553 |
| 41.               | (CH <sub>3</sub> )NH <sub>2</sub> -BH <sub>3</sub> | 0      | 1    | 0, 0   | 1, 1  | 1.640 |
| 42.               | HF-BH <sub>3</sub>                                 | 0      | 1    | 0, 0   | 1, 1  | 2.286 |

**Table S4:** Details of charge (Icharg) and multiplicity (Mult) used in the LMO-EDA calculation for the considered non-covalent systems. Mmult is the multiplicity for each moiety. Bond distance (BD) has been shown in Å.

| S. No. | Non-covalent                                     | Icharg | Mult | Mcharg | Mmult | BD    | S. No. | Non-covalent                                      | Icharg | Mult | Mcharg | Mmult | BD    |
|--------|--------------------------------------------------|--------|------|--------|-------|-------|--------|---------------------------------------------------|--------|------|--------|-------|-------|
| 1.     | H <sub>2</sub> O-H <sub>2</sub> O                | 0      | 1    | 0, 0   | 1, 1  | 1.950 | 23.    | LiH-ClCF <sub>3</sub>                             | 0      | 1    | 0, 0   | 1, 1  | 2.835 |
| 2.     | NH <sub>3</sub> -NH <sub>3</sub>                 | 0      | 1    | 0, 0   | 1, 1  | 2.263 | 24.    | C <sub>2</sub> H <sub>4</sub> -CH <sub>3</sub> CN | 0      | 1    | 0, 0   | 1, 1  | 3.644 |
| 3.     | NH <sub>3</sub> -NH <sub>4</sub> <sup>+</sup>    | 1      | 1    | 0, 1   | 1, 1  | 1.815 | 25.    | LiF-CH <sub>3</sub> F                             | 0      | 1    | 0, 0   | 1, 1  | 2.844 |
| 4.     | H <sub>2</sub> O-NH <sub>4</sub> <sup>+</sup>    | 1      | 1    | 1, 0   | 1, 1  | 1.649 | 26.    | H <sub>2</sub> O-CH <sub>3</sub> OH               | 0      | 1    | 0, 0   | 1, 1  | 3.104 |
| 5.     | H <sub>2</sub> O-Li <sup>+</sup>                 | 1      | 1    | 0, 1   | 1, 1  | 1.866 | 27.    | FH <sub>2</sub> P-NH <sub>2</sub> F               | 0      | 1    | 0, 0   | 1, 1  | 2.664 |
| 6.     | NH <sub>3</sub> -Li <sup>+</sup>                 | 1      | 1    | 0, 1   | 1, 1  | 1.997 | 28.    | FH <sub>2</sub> P-NH <sub>2</sub> Me              | 0      | 1    | 0, 0   | 1, 1  | 2.534 |
| 7.     | C <sub>2</sub> H <sub>2</sub> -HCN               | 0      | 1    | 0, 0   | 1, 1  | 2.598 | 29.    | F(Me)S-NH <sub>3</sub>                            | 0      | 1    | 0, 0   | 1, 1  | 2.836 |
| 8.     | C <sub>2</sub> H <sub>2</sub> -HNC               | 0      | 1    | 0, 0   | 1, 1  | 2.300 | 30.    | OH(Me)S-NH <sub>3</sub>                           | 0      | 1    | 0, 0   | 1, 1  | 3.196 |
| 9.     | NH <sub>3</sub> -C <sub>2</sub> H <sub>4</sub>   | 0      | 1    | 0, 0   | 1, 1  | 2.711 | 31.    | CN(H <sub>3</sub> )Si-CN(H <sub>3</sub> )Si       | 0      | 1    | 0, 0   | 1, 1  | 3.021 |
| 10.    | CH <sub>4</sub> -Bz                              | 0      | 1    | 0, 0   | 1, 1  | 2.575 | 32.    | NC(H <sub>3</sub> )Si-NC(H <sub>3</sub> )Si       | 0      | 1    | 0, 0   | 1, 1  | 3.025 |
| 11.    | NH <sub>3</sub> -Bz                              | 0      | 1    | 0, 0   | 1, 1  | 2.476 | 33.    | C <sub>2</sub> H <sub>4</sub> -LiF                | 0      | 1    | 0, 0   | 1, 1  | 2.377 |
| 12.    | H <sub>2</sub> O-CNbz                            | 0      | 1    | 0, 0   | 1, 1  | 2.946 | 34.    | H <sub>2</sub> O-LiF                              | 0      | 1    | 0, 0   | 1, 1  | 1.957 |
| 13.    | Cl <sup>-</sup> -FBz                             | -1     | 1    | 0, -1  | 1, 1  | 3.099 | 35.    | H <sub>3</sub> N-LiF                              | 0      | 1    | 0, 0   | 1, 1  | 2.076 |
| 14.    | Li <sup>+</sup> -Bz                              | 1      | 1    | 0, 1   | 1, 1  | 1.869 | 36.    | He <sub>2</sub>                                   | 0      | 1    | 0, 0   | 1, 1  | 3.335 |
| 15.    | Bz-Bz                                            | 0      | 1    | 0, 0   | 1, 1  | 3.635 | 37.    | Ne <sub>2</sub>                                   | 0      | 1    | 0, 0   | 1, 1  | 3.171 |
| 16.    | Pyridine-Bz                                      | 0      | 1    | 0, 0   | 1, 1  | 3.578 | 38.    | Ar <sub>2</sub>                                   | 0      | 1    | 0, 0   | 1, 1  | 4.085 |
| 17.    | Li <sup>+</sup> -C <sub>2</sub> H <sub>6</sub>   | 1      | 1    | 0, 1   | 1, -1 | 2.141 | 39.    | Propane <sub>2</sub>                              | 0      | 1    | 0, 0   | 1, 1  | 2.610 |
| 18.    | Li <sup>+</sup> -CH <sub>4</sub>                 | 1      | 1    | 0, 1   | 1, 1  | 2.157 | 40.    | DHB-Me                                            | 0      | 1    | 0, 0   | 1, 1  | 2.001 |
| 19.    | CH <sub>3</sub> NH <sub>2</sub> -I <sub>2</sub>  | 0      | 1    | 0, 0   | 1, 1  | 2.623 | 41.    | DHB-Et                                            | 0      | 1    | 0, 0   | 1, 1  | 2.022 |
| 20.    | (CH <sub>3</sub> ) <sub>3</sub> N-I <sub>2</sub> | 0      | 1    | 0, 0   | 1, 1  | 2.540 | 42.    | HBeCHN(H)-Be(H)CHN(H)                             | 0      | 1    | 0, 0   | 1, 1  | 1.751 |
| 21.    | C <sub>2</sub> H <sub>2</sub> -ClCN              | 0      | 1    | 0, 0   | 1, 1  | 3.371 | 43.    | FBeCHN(H)-Be(F)CHN(H)                             | 0      | 1    | 0, 0   | 1, 1  | 1.765 |
| 22.    | H <sub>3</sub> N-ClCN                            | 0      | 1    | 0, 0   | 1, 1  | 3.001 |        |                                                   |        |      |        |       |       |

**Table S5:** Comparison of the calculated interaction energy of covalent, ionic, and coordinate bonds at MP2, B3LYP, and M05-2X from the corresponding CCSD(T) results. It also has shown the mean absolute value of the MP2, B3LYP, and M05-2X results from the corresponding CCSD(T) values. Energies in kcal/mol.

| S. No.                     | Covalent                                           | MP2     | B3LYP   | M05-2X  | CCSD(T) | M1           | M2          | M3          |
|----------------------------|----------------------------------------------------|---------|---------|---------|---------|--------------|-------------|-------------|
| 1.                         | H <sub>2</sub>                                     | -100.82 | -109.84 | -106.97 | -105.87 | -5.06        | 3.96        | 1.10        |
| 2.                         | N <sub>2</sub>                                     | -375.55 | -351.12 | -355.90 | -337.87 | <b>37.68</b> | 13.25       | 18.03       |
| 3.                         | O <sub>2</sub>                                     | -116.91 | -119.36 | -113.69 | -105.64 | 11.27        | 13.72       | 8.05        |
| 4.                         | Cl <sub>2</sub>                                    | -43.08  | -47.41  | -49.43  | -41.91  | 1.17         | 5.50        | 7.51        |
| 5.                         | HF                                                 | -137.73 | -137.75 | -138.45 | -134.08 | 3.65         | 3.67        | 4.37        |
| 6.                         | HCl                                                | -99.74  | -103.40 | -103.84 | -100.49 | -0.76        | 2.90        | 3.35        |
| 7.                         | FCl                                                | -50.32  | -52.63  | -51.54  | -46.42  | 3.90         | 6.21        | 5.13        |
| 8.                         | BH <sub>3</sub>                                    | -105.21 | -110.71 | -112.12 | -107.94 | -1.35        | 16.71       | 16.60       |
| 9.                         | NH <sub>3</sub>                                    | -112.15 | -113.40 | -114.99 | -110.65 | -1.14        | 22.78       | 22.34       |
| 10.                        | CH <sub>4</sub>                                    | -114.13 | -117.91 | -119.07 | -115.14 | -2.41        | 21.50       | 24.48       |
| 11.                        | H <sub>2</sub> O                                   | -122.54 | -121.76 | -123.16 | -119.54 | 3.16         | 10.13       | 11.39       |
| 12.                        | PH <sub>3</sub>                                    | -81.03  | -85.56  | -85.20  | -83.27  | -8.59        | 17.93       | 17.50       |
| 13.                        | H <sub>2</sub> S                                   | -88.99  | -92.46  | -92.76  | -90.62  | -4.06        | 8.37        | 9.93        |
| 14.                        | BCl <sub>3</sub>                                   | -120.07 | -113.11 | -119.93 | -115.66 | 26.87        | -12.59      | 13.00       |
| 15.                        | NCl <sub>3</sub>                                   | -39.61  | -27.80  | -34.61  | -30.56  | 14.23        | -3.00       | 9.27        |
| 16.                        | OCl <sub>2</sub>                                   | -42.20  | -31.47  | -35.90  | -30.66  | 15.08        | 5.46        | 16.31       |
| 17.                        | PCl <sub>3</sub>                                   | -66.84  | -64.07  | -68.79  | -63.12  | 22.41        | 7.57        | 34.55       |
| 18.                        | SCl <sub>2</sub>                                   | -49.93  | -49.86  | -53.51  | -47.18  | 17.14        | 13.20       | 33.51       |
| 19.                        | CCl <sub>4</sub>                                   | -77.90  | -65.52  | -74.62  | -71.42  | 23.90        | -22.53      | 6.97        |
| 20.                        | C <sub>2</sub> H <sub>6</sub>                      | -113.99 | -109.69 | -116.54 | -110.70 | 3.29         | -1.01       | 5.84        |
| 21.                        | C <sub>2</sub> H <sub>4</sub>                      | -215.73 | -208.63 | -211.43 | -203.27 | 12.46        | 5.36        | 8.16        |
| 22.                        | C <sub>2</sub> H <sub>2</sub>                      | -243.80 | -233.57 | -237.52 | -227.80 | 16.00        | 5.77        | 9.72        |
| 23.                        | CH <sub>3</sub> OH                                 | -105.85 | -100.52 | -106.24 | -99.88  | 5.97         | 0.64        | 6.36        |
| 24.                        | CH <sub>3</sub> SH                                 | -84.28  | -80.05  | -86.43  | -81.45  | 2.82         | -1.40       | 4.98        |
| <b>Mean Absolute Value</b> |                                                    |         |         |         |         | <b>6.42</b>  | <b>3.90</b> | <b>5.48</b> |
| <b>Ionic</b>               |                                                    |         |         |         |         |              |             |             |
| 25.                        | NaCl                                               | -91.01  | -92.45  | -101.75 | -89.22  | 1.79         | 3.23        | 12.53       |
| 26.                        | LiH                                                | -48.22  | -58.17  | -58.70  | -53.20  | -4.98        | 4.97        | 5.50        |
| 27.                        | NaH                                                | -35.02  | -45.00  | -47.46  | -40.46  | -5.44        | 4.54        | 7.00        |
| 28.                        | KH                                                 | -30.27  | -42.67  | -45.71  | -35.13  | -4.86        | 7.54        | 10.58       |
| 29.                        | CaS                                                | -98.13  | -114.30 | -109.04 | -83.52  | 14.60        | 30.78       | 25.52       |
| 30.                        | AlN                                                | -94.19  | -96.85  | -93.88  | -100.31 | -6.13        | -3.46       | -6.43       |
| 31.                        | MgCl <sub>2</sub>                                  | -106.88 | -105.51 | -114.05 | -104.83 | 2.05         | 0.68        | 9.22        |
| 32.                        | MgH <sub>2</sub>                                   | -65.44  | -72.03  | -71.70  | -69.21  | -3.10        | 7.30        | 0.15        |
| 33.                        | CaH <sub>2</sub>                                   | -52.37  | -59.86  | -62.03  | -55.93  | -4.11        | 14.70       | 8.74        |
| <b>Mean Absolute Value</b> |                                                    |         |         |         |         | <b>5.24</b>  | <b>6.88</b> | <b>9.49</b> |
| <b>Coordinate</b>          |                                                    |         |         |         |         |              |             |             |
| 34.                        | NH <sub>3</sub> -BH <sub>3</sub>                   | -45.25  | -41.78  | -43.40  | -44.28  | 0.96         | -2.50       | -0.89       |
| 35.                        | NH <sub>3</sub> -BF <sub>3</sub>                   | -48.17  | -44.72  | -51.33  | -48.32  | -0.15        | -3.60       | 3.01        |
| 36.                        | PH <sub>3</sub> -BH <sub>3</sub>                   | -39.15  | -34.34  | -36.50  | -37.36  | 1.79         | -3.01       | -0.86       |
| 37.                        | PH <sub>3</sub> -AlH <sub>3</sub>                  | -18.54  | -16.15  | -20.17  | -18.39  | 0.15         | -2.23       | 1.79        |
| 38.                        | H <sub>2</sub> S-BH <sub>3</sub>                   | -24.68  | -20.00  | -21.92  | -23.96  | 0.73         | -3.96       | -2.03       |
| 39.                        | H <sub>2</sub> S-AlH <sub>3</sub>                  | -14.67  | -12.11  | -16.23  | -14.60  | 0.07         | -2.49       | 1.63        |
| 40.                        | CO-BH <sub>3</sub>                                 | -36.52  | -39.59  | -36.41  | -33.57  | 2.95         | 6.02        | 2.84        |
| 41.                        | (CH <sub>3</sub> )NH <sub>2</sub> -BH <sub>3</sub> | -51.44  | -46.56  | -49.46  | -50.19  | 1.25         | -3.63       | -0.73       |
| 42.                        | HF-BH <sub>3</sub>                                 | -3.49   | -3.13   | -4.62   | -3.63   | -0.13        | -0.49       | 1.00        |
| <b>Mean Absolute Value</b> |                                                    |         |         |         |         | <b>0.91</b>  | <b>3.11</b> | <b>1.64</b> |

$$\mathbf{M1} = \text{IE}_{\text{CCSD(T)}} - \text{IE}_{\text{MP2}}, \mathbf{M2} = \text{IE}_{\text{CCSD(T)}} - \text{IE}_{\text{B3LYP}}, \mathbf{M3} = \text{IE}_{\text{CCSD(T)}} - \text{IE}_{\text{M05-2X}}$$



**Table S6:** Comparison of the calculated interaction energy at MP2, B3LYP, and M05-2X from the corresponding CCSD(T) results. It also has shown the mean absolute value of the MP2, B3LYP, and M05-2X results from the corresponding CCSD(T) values. Energies in kcal/mol.

| S. No.                     | Non-covalent                                      | MP2    | B3LYP  | M05-2X | CCSD(T) | M1          | M2          | M3          |
|----------------------------|---------------------------------------------------|--------|--------|--------|---------|-------------|-------------|-------------|
| 1.                         | H <sub>2</sub> O- H <sub>2</sub> O                | -6.11  | -5.79  | -6.47  | -4.13   | 1.98        | 1.65        | 2.34        |
| 2.                         | NH <sub>3</sub> - NH <sub>3</sub>                 | -3.80  | -3.33  | -3.94  | -3.72   | 0.08        | -0.39       | 0.22        |
| 3.                         | NH <sub>3</sub> - NH <sub>4</sub> <sup>+</sup>    | -31.59 | -32.00 | -32.29 | -30.86  | 0.73        | 1.14        | 1.43        |
| 4.                         | H <sub>2</sub> O- NH <sub>4</sub> <sup>+</sup>    | -22.17 | -22.39 | -22.76 | -21.79  | 0.37        | 0.60        | 0.96        |
| 5.                         | H <sub>2</sub> O-Li <sup>+</sup>                  | -35.50 | -36.55 | -37.00 | -35.34  | 0.16        | 1.21        | 1.66        |
| 6.                         | NH <sub>3</sub> -Li <sup>+</sup>                  | -40.84 | -41.78 | -42.06 | -40.64  | 0.21        | 1.14        | 1.42        |
| 7.                         | C <sub>2</sub> H <sub>2</sub> -HCN                | -2.77  | -1.81  | -2.62  | -2.61   | 0.16        | -0.80       | 0.01        |
| 8.                         | C <sub>2</sub> H <sub>2</sub> -HNC                | -4.44  | -3.09  | -3.98  | -3.92   | 0.52        | -0.83       | 0.06        |
| 9.                         | NH <sub>3</sub> -C <sub>2</sub> H <sub>4</sub>    | -1.84  | -0.59  | -1.78  | -1.74   | 0.10        | -1.15       | 0.05        |
| 10.                        | CH <sub>4</sub> -Bz                               | -2.66  | 0.79   | -1.39  | -2.32   | 0.34        | -3.11       | -0.93       |
| 11.                        | NH <sub>3</sub> -Bz                               | -3.53  | -0.21  | -2.64  | -3.17   | 0.36        | -2.96       | -0.53       |
| 12.                        | H <sub>2</sub> O-CNBz                             | -6.90  | -3.47  | -5.91  | -6.71   | 0.19        | -3.24       | -0.80       |
| 13.                        | Cl-FBz                                            | -18.55 | -11.36 | -15.59 | -18.60  | -0.05       | -7.25       | -3.01       |
| 14.                        | Li <sup>+</sup> -Bz                               | -38.85 | -38.91 | -42.51 | -38.35  | 0.50        | 0.56        | 4.16        |
| 15.                        | Bz-Bz                                             | -7.45  | 4.26   | -2.04  | -5.00   | 2.45        | -9.26       | -2.96       |
| 16.                        | Pyridine-Bz                                       | -7.98  | 3.65   | -2.79  | -5.51   | 2.47        | -9.16       | -2.72       |
| 17.                        | Li <sup>+</sup> -C <sub>2</sub> H <sub>6</sub>    | -16.50 | -17.81 | -18.38 | -16.40  | 0.10        | 1.41        | 1.98        |
| 18.                        | Li <sup>+</sup> -CH <sub>4</sub>                  | -12.90 | -13.82 | -13.99 | -12.84  | 0.06        | 0.98        | 1.15        |
| 19.                        | CH <sub>3</sub> NH <sub>2</sub> -I <sub>2</sub>   | -13.66 | -11.44 | -14.15 | -11.75  | 1.91        | -0.31       | 2.40        |
| 20.                        | (CH <sub>3</sub> ) <sub>3</sub> N-I <sub>2</sub>  | -20.66 | -12.74 | -19.04 | -17.16  | 3.30        | -4.42       | 1.88        |
| 21.                        | C <sub>2</sub> H <sub>2</sub> -ClCN               | -2.23  | -1.09  | -2.24  | -2.05   | 0.18        | -0.96       | 0.19        |
| 22.                        | H <sub>3</sub> N-ClCN                             | -4.61  | -4.37  | -5.46  | -4.55   | 0.06        | -0.18       | 0.91        |
| 23.                        | LiH-ClCF <sub>3</sub>                             | -3.24  | -2.92  | -3.60  | -3.25   | -0.01       | -0.33       | 0.34        |
| 24.                        | C <sub>2</sub> H <sub>4</sub> -CH <sub>3</sub> CN | -1.51  | -0.02  | -1.27  | -1.46   | 0.05        | -1.44       | -0.18       |
| 25.                        | LiF-CH <sub>3</sub> F                             | -4.49  | -3.97  | -5.49  | -4.70   | -0.21       | -0.73       | 0.79        |
| 26.                        | H <sub>2</sub> O-CH <sub>3</sub> OH               | -1.63  | -0.78  | -1.85  | -1.70   | -0.07       | -0.92       | 0.16        |
| 27.                        | FH <sub>2</sub> P- NH <sub>2</sub> F              | -6.31  | -5.88  | -7.58  | -5.85   | 0.46        | 0.03        | 1.73        |
| 28.                        | FH <sub>2</sub> P- NH <sub>2</sub> Me             | -9.99  | -8.60  | -11.56 | -9.31   | 0.68        | -0.72       | 2.24        |
| 29.                        | F(Me)S-NH <sub>3</sub>                            | -5.78  | -4.98  | -7.08  | -5.50   | 0.27        | -0.52       | 1.58        |
| 30.                        | OH(Me)S-NH <sub>3</sub>                           | -3.91  | -2.48  | -4.38  | -3.84   | 0.07        | -1.35       | 0.54        |
| 31.                        | CN(H <sub>3</sub> )Si- CN(H <sub>3</sub> )Si      | -5.42  | -3.67  | -5.14  | -5.09   | 0.33        | -1.43       | 0.05        |
| 32.                        | NC(H <sub>3</sub> )Si- NC(H <sub>3</sub> )Si      | -4.70  | -3.25  | -4.98  | -4.62   | 0.08        | -1.36       | 0.36        |
| 33.                        | C <sub>2</sub> H <sub>4</sub> -LiF                | -10.24 | -9.13  | -10.22 | -10.26  | -0.01       | -1.12       | -0.03       |
| 34.                        | H <sub>2</sub> O-LiF                              | -19.14 | -18.55 | -19.32 | -19.23  | -0.09       | -0.68       | 0.09        |
| 35.                        | NH <sub>3</sub> -LiF                              | -22.50 | -21.73 | -22.41 | -22.62  | -0.12       | -0.90       | -0.22       |
| 36.                        | He <sub>2</sub>                                   | -0.01  | 0.03   | 0.00   | -0.01   | 0.00        | -0.03       | -0.01       |
| 37.                        | Ne <sub>2</sub>                                   | -0.13  | -0.06  | -v0.15 | -0.15   | -0.01       | -0.09       | 0.00        |
| 38.                        | Ar <sub>2</sub>                                   | -0.16  | 0.11   | -0.20  | -0.16   | 0.00        | -0.27       | 0.04        |
| 39.                        | Propen2                                           | -2.13  | 0.95   | -1.84  | -2.13   | 0.00        | -3.08       | -0.29       |
| 40.                        | DHB-Me                                            | -16.25 | -12.57 | -16.11 | -16.09  | 0.15        | -3.52       | 0.02        |
| 41.                        | DHB-Et                                            | -16.27 | -11.85 | -15.75 | -16.15  | 0.12        | -4.31       | -0.40       |
| 42.                        | HBeCHN(H)-Be(H)CHN(H)                             | -41.07 | -38.80 | -43.50 | -40.70  | 0.36        | -1.90       | 2.80        |
| 43.                        | FBeCHN(H)-Be(F)CHN(H)                             | -42.22 | -39.79 | -45.26 | -42.33  | -0.11       | -2.55       | 2.92        |
| <b>Mean Absolute Value</b> |                                                   |        |        |        |         | <b>0.45</b> | <b>1.86</b> | <b>1.08</b> |

$$\mathbf{M1} = \text{IE}_{\text{CCSD(T)}} - \text{IE}_{\text{MP2}}, \mathbf{M2} = \text{IE}_{\text{CCSD(T)}} - \text{IE}_{\text{B3LYP}}, \mathbf{M3} = \text{IE}_{\text{CCSD(T)}} - \text{IE}_{\text{M05-2X}}$$

**Table S7:** Calculated interaction energy (kcal/mol) at MP2 and the available experimental values<sup>142</sup> of interaction energy for covalent, ionic, and non-covalent bonds. All values are in kcal/mol.

| <b>Systems</b>                   | <b>MP2</b> | <b>Exp</b>   |
|----------------------------------|------------|--------------|
| H <sub>2</sub>                   | -100.82    | -109.30      |
| N <sub>2</sub>                   | -375.55    | -228.53      |
| O <sub>2</sub>                   | -116.91    | -119.90      |
| Cl <sub>2</sub>                  | -43.08     | -59.70       |
| HF                               | -137.73    | -140.90      |
| HCl                              | -99.74     | -106.54      |
| ClF                              | -50.32     | -58.34       |
| LiH                              | -48.22     | -58.02       |
| NaH                              | -35.02     | -49.0 + 4.6  |
| KH                               | -30.27     | - 44.3 + 3.5 |
| Li <sup>+</sup> -Bz              | -38.85     | -38.5 ± 3.2  |
| Na <sup>+</sup> -Bz              | -23.98     | -22.1 ± 1.4  |
| K <sup>+</sup> -Bz               | -19.48     | -17.5 ± 0.9  |
| H <sub>2</sub> O-Li <sup>+</sup> | -35.50     | -32.62 ± 3.3 |
| NH <sub>3</sub> -Bz              | -3.53      | -1.84 ± 0.12 |
| Ne <sub>2</sub>                  | -0.13      | -0.08        |

**Table S8(a):** Contribution of interaction energy components (kcal/mol) at MP2/6-311++G\*\* level using LMO-EDA approach for the covalent systems.

| S. No. | Covalent                      | Electrostatic | Exchange | Repulsion | Polarization | Dispersion |
|--------|-------------------------------|---------------|----------|-----------|--------------|------------|
| 1.     | H <sub>2</sub>                | -1.13         | 0.00     | 0.00      | -82.24       | -17.44     |
| 2.     | N <sub>2</sub>                | -311.89       | -449.97  | 1208.73   | -552.09      | -108.71    |
| 3.     | O <sub>2</sub>                | -142.35       | -302.39  | 755.95    | -282.58      | -110.64    |
| 4.     | Cl <sub>2</sub>               | -43.82        | -110.38  | 238.27    | -94.98       | -28.49     |
| 5.     | HF                            | -112.42       | -226.46  | 570.43    | -327.14      | -39.13     |
| 6.     | HCl                           | -65.99        | -98.83   | 227.10    | -137.62      | -21.58     |
| 7.     | FCI                           | -41.85        | -121.28  | 272.60    | -107.30      | -48.48     |
| 8.     | BH <sub>3</sub>               | -55.75        | -39.07   | 88.77     | -82.01       | -16.65     |
| 9.     | NH <sub>3</sub>               | -89.48        | -172.66  | 382.71    | -203.34      | -27.23     |
| 10.    | CH <sub>4</sub>               | -63.81        | -76.54   | 161.15    | -112.49      | -21.57     |
| 11.    | H <sub>2</sub> O              | -122.33       | -242.30  | 597.50    | -318.99      | -33.45     |
| 12.    | PH <sub>3</sub>               | -60.11        | -80.95   | 175.35    | -97.33       | -16.24     |
| 13.    | H <sub>2</sub> S              | -93.91        | -200.61  | 473.33    | -246.19      | -18.14     |
| 14.    | BCl <sub>3</sub>              | -155.37       | -185.48  | 430.96    | -176.68      | -26.30     |
| 15.    | NCl <sub>3</sub>              | -88.15        | -176.36  | 389.40    | -119.52      | -37.08     |
| 16.    | OCl <sub>2</sub>              | -60.50        | -142.18  | 313.33    | -100.92      | -46.39     |
| 17.    | PCl <sub>3</sub>              | -98.26        | -162.36  | 358.73    | -134.88      | -23.63     |
| 18.    | SCl <sub>2</sub>              | -65.05        | -133.40  | 289.65    | -110.25      | -25.54     |
| 19.    | CCl <sub>4</sub>              | -96.39        | -163.17  | 359.25    | -137.82      | -30.60     |
| 20.    | C <sub>2</sub> H <sub>6</sub> | -142.01       | -180.23  | 381.03    | -141.30      | -28.08     |
| 21.    | C <sub>2</sub> H <sub>4</sub> | -447.34       | -667.79  | 1866.75   | -928.95      | -30.20     |
| 22.    | C <sub>2</sub> H <sub>2</sub> | -454.01       | -679.44  | 2002.73   | -1047.60     | -59.15     |
| 23.    | CH <sub>3</sub> OH            | -195.50       | -321.72  | 786.15    | -332.59      | -36.95     |
| 24.    | CH <sub>3</sub> SH            | -115.84       | -165.71  | 357.29    | -128.26      | -26.52     |

**Table S8(b):** Contribution of interaction energy components (%) at MP2/6-311++G\*\* level using LMO-EDA approach for the covalent systems.

| S. No. | Covalent                      | Electrostatic | Exchange | Polarization | Dispersion |
|--------|-------------------------------|---------------|----------|--------------|------------|
| 1.     | H <sub>2</sub>                | 1.12          | 0.00     | 81.58        | 17.30      |
| 2.     | N <sub>2</sub>                | 21.92         | 31.63    | 38.81        | 7.64       |
| 3.     | O <sub>2</sub>                | 16.99         | 36.09    | 33.72        | 13.20      |
| 4.     | Cl <sub>2</sub>               | 15.78         | 39.75    | 34.21        | 10.26      |
| 5.     | HF                            | 15.94         | 32.12    | 46.39        | 5.55       |
| 6.     | HCl                           | 20.37         | 30.50    | 42.47        | 6.66       |
| 7.     | FCI                           | 13.12         | 38.03    | 33.65        | 15.20      |
| 8.     | BH <sub>3</sub>               | 28.81         | 20.19    | 42.39        | 8.61       |
| 9.     | NH <sub>3</sub>               | 18.16         | 35.04    | 41.27        | 5.53       |
| 10.    | CH <sub>4</sub>               | 23.25         | 27.89    | 40.99        | 7.86       |
| 11.    | H <sub>2</sub> O              | 17.06         | 33.79    | 44.49        | 4.66       |
| 12.    | PH <sub>3</sub>               | 23.61         | 31.79    | 38.22        | 6.38       |
| 13.    | H <sub>2</sub> S              | 16.80         | 35.90    | 44.05        | 3.25       |
| 14.    | BCl <sub>3</sub>              | 28.57         | 34.11    | 32.49        | 4.84       |
| 15.    | NCl <sub>3</sub>              | 20.93         | 41.88    | 28.38        | 8.81       |
| 16.    | OCl <sub>2</sub>              | 17.29         | 40.62    | 28.84        | 13.25      |
| 17.    | PCl <sub>3</sub>              | 23.44         | 38.74    | 32.18        | 5.64       |
| 18.    | SCl <sub>2</sub>              | 19.46         | 39.91    | 32.99        | 7.64       |
| 19.    | CCl <sub>4</sub>              | 22.52         | 38.13    | 32.20        | 7.15       |
| 20.    | C <sub>2</sub> H <sub>6</sub> | 28.89         | 36.66    | 28.74        | 5.71       |
| 21.    | C <sub>2</sub> H <sub>4</sub> | 21.57         | 32.19    | 44.78        | 1.46       |
| 22.    | C <sub>2</sub> H <sub>2</sub> | 20.27         | 30.33    | 46.76        | 2.64       |
| 23.    | CH <sub>3</sub> OH            | 22.05         | 36.28    | 37.51        | 4.17       |
| 24.    | CH <sub>3</sub> SH            | 26.55         | 37.98    | 29.40        | 6.08       |

**Table S9 (a):** Contribution of interaction energy components (kcal/mol) at MP2/6-311++G\*\* level using LMO-EDA approach for the ionic systems.

| S. No. | Ionic             | Electrostatic | Exchange | Repulsion | Polarization | Dispersion |
|--------|-------------------|---------------|----------|-----------|--------------|------------|
| 25.    | NaCl              | -143.83       | -17.93   | 45.10     | -10.69       | -71.03     |
| 26.    | LiH               | -393.70       | -12.53   | 40.37     | -44.12       | 7.41       |
| 27.    | NaH               | -168.49       | -26.91   | 68.69     | -15.77       | -0.97      |
| 25.    | KH                | -160.26       | -41.54   | 96.02     | -13.31       | -3.13      |
| 29.    | CaS               | -359.40       | -46.71   | 133.97    | -222.90      | -184.02    |
| 30.    | AlN               | -860.91       | -12.74   | 48.03     | -676.90      | -159.89    |
| 31.    | MgCl <sub>2</sub> | -206.51       | -28.59   | 77.14     | -44.52       | 1.73       |
| 32.    | MgH <sub>2</sub>  | -431.39       | -30.46   | 75.82     | -64.86       | 8.54       |
| 33.    | CaH <sub>2</sub>  | -221.54       | -60.97   | 145.20    | -36.98       | 1.17       |

**Table S9 (b):** Contribution of interaction energy components (%) at MP2/6-311++G\*\* level using LMO-EDA approach for the ionic systems.

| <b>S. No.</b> | <b>Ionic</b>      | <b>Electrostatic</b> | <b>Exchange</b> | <b>Polarization</b> | <b>Dispersion</b> |
|---------------|-------------------|----------------------|-----------------|---------------------|-------------------|
| 25.           | NaCl              | 59.07                | 7.36            | 4.39                | 29.17             |
| 26.           | LiH               | 88.88                | 2.83            | 9.96                | -1.67             |
| 27.           | NaH               | 79.42                | 12.69           | 7.43                | 0.46              |
| 25.           | KH                | 73.43                | 19.03           | 6.10                | 1.43              |
| 29.           | CaS               | 44.21                | 5.75            | 27.42               | 22.63             |
| 30.           | AlN               | 50.33                | 0.74            | 39.57               | 9.35              |
| 31.           | MgCl <sub>2</sub> | 74.31                | 10.29           | 16.02               | -0.62             |
| 32.           | MgH <sub>2</sub>  | 83.25                | 5.88            | 12.52               | -1.65             |
| 33.           | CaH <sub>2</sub>  | 69.60                | 19.15           | 11.62               | -0.37             |

**Table S10 (a):** Contribution of interaction energy components (kcal/mol) at MP2/6-311++G\*\* level using LMO-EDA approach for the coordinate systems.

| S. No. | Systems                                            | Electrostatic | Exchange | Repulsion | Polarization | Dispersion |
|--------|----------------------------------------------------|---------------|----------|-----------|--------------|------------|
| 34.    | NH <sub>3</sub> -BH <sub>3</sub>                   | -80.40        | -121.33  | 233.85    | -65.81       | -7.18      |
| 35.    | NH <sub>3</sub> -BF <sub>3</sub>                   | -96.59        | -110.87  | 232.14    | -72.12       | 5.65       |
| 36.    | PH <sub>3</sub> -BH <sub>3</sub>                   | -67.95        | -142.92  | 271.17    | -83.27       | -11.11     |
| 37.    | PH <sub>3</sub> -AlH <sub>3</sub>                  | -35.21        | -49.22   | 93.19     | -22.35       | -2.01      |
| 38.    | H <sub>2</sub> S-BH <sub>3</sub>                   | -46.17        | -101.27  | 191.44    | -53.33       | -10.20     |
| 39.    | H <sub>2</sub> S-AlH <sub>3</sub>                  | -26.67        | -38.68   | 73.09     | -17.10       | -2.43      |
| 40.    | CO-BH <sub>3</sub>                                 | -67.69        | -148.25  | 291.17    | -94.24       | -14.66     |
| 41.    | (CH <sub>3</sub> )NH <sub>2</sub> -BH <sub>3</sub> | -88.62        | -130.00  | 250.47    | -70.11       | -8.68      |
| 42.    | HF-BH <sub>3</sub>                                 | -6.99         | -10.87   | 19.61     | -2.75        | -1.27      |

**Table S10 (b):** Contribution of interaction energy components (%) at MP2/6-311++G\*\* level using LMO-EDA approach for the coordinate systems.

| S. No. | Systems                                            | Electrostatic | Exchange | Polarization | Dispersion |
|--------|----------------------------------------------------|---------------|----------|--------------|------------|
| 34.    | NH <sub>3</sub> -BH <sub>3</sub>                   | 29.27         | 44.16    | 23.96        | 2.61       |
| 35.    | NH <sub>3</sub> -BF <sub>3</sub>                   | 35.26         | 40.47    | 26.33        | -2.06      |
| 36.    | PH <sub>3</sub> -BH <sub>3</sub>                   | 22.26         | 46.82    | 27.28        | 3.64       |
| 37.    | PH <sub>3</sub> -AlH <sub>3</sub>                  | 32.37         | 45.24    | 20.54        | 1.85       |
| 38.    | H <sub>2</sub> S-BH <sub>3</sub>                   | 21.88         | 48.00    | 25.28        | 4.83       |
| 39.    | H <sub>2</sub> S-AlH <sub>3</sub>                  | 31.42         | 45.57    | 20.15        | 2.86       |
| 40.    | CO-BH <sub>3</sub>                                 | 20.84         | 45.64    | 29.01        | 4.51       |
| 41.    | (CH <sub>3</sub> )NH <sub>2</sub> -BH <sub>3</sub> | 29.80         | 43.71    | 23.57        | 2.92       |
| 42.    | HF-BH <sub>3</sub>                                 | 31.95         | 49.68    | 12.57        | 5.80       |



**Table S11 (a):** Contribution of interaction energy components (kcal/mol) at MP2/6-311++G\*\* level using LMO-EDA approach for the non-covalent systems.

| S. No. | Non-covalent                                      | Electrostatic | Exchange | Repulsion | Polarization | Dispersion |
|--------|---------------------------------------------------|---------------|----------|-----------|--------------|------------|
| 1.     | H <sub>2</sub> O-H <sub>2</sub> O                 | -8.75         | -8.46    | 15.23     | -2.19        | -0.29      |
| 2.     | NH <sub>3</sub> -NH <sub>3</sub>                  | -5.69         | -7.49    | 12.74     | -1.47        | -0.80      |
| 3.     | NH <sub>3</sub> -NH <sub>4</sub> <sup>+</sup>     | -39.54        | -38.99   | 77.49     | -25.52       | -2.57      |
| 4.     | H <sub>2</sub> O-NH <sub>4</sub> <sup>+</sup>     | -26.41        | -18.27   | 36.06     | -10.88       | -0.75      |
| 5.     | H <sub>2</sub> O-Li <sup>+</sup>                  | -36.00        | -5.75    | 16.96     | -10.98       | 2.15       |
| 6.     | NH <sub>3</sub> -Li <sup>+</sup>                  | -43.10        | -7.69    | 23.28     | -13.01       | 1.52       |
| 7.     | C <sub>2</sub> H <sub>2</sub> -HCN                | -3.34         | -3.68    | 6.60      | -1.04        | -0.36      |
| 8.     | C <sub>2</sub> H <sub>2</sub> -HNC                | -5.37         | -6.76    | 12.47     | -2.33        | -1.27      |
| 9.     | NH <sub>3</sub> -C <sub>2</sub> H <sub>4</sub>    | -2.03         | -3.53    | 5.89      | -0.41        | -0.95      |
| 10.    | CH <sub>4</sub> -Bz                               | -1.13         | -5.32    | 8.23      | -0.35        | -2.29      |
| 11.    | NH <sub>3</sub> -Bz                               | -2.11         | -5.46    | 8.77      | -0.60        | -2.20      |
| 12.    | H <sub>2</sub> O-CNBz                             | -5.43         | -6.28    | 10.21     | -0.96        | -1.75      |
| 13.    | Cl <sup>-</sup> -FBz                              | -20.48        | -26.25   | 43.09     | -6.48        | -2.48      |
| 14.    | Li <sup>+</sup> -Bz                               | -18.92        | -6.22    | 18.14     | -31.96       | -3.13      |
| 15.    | Bz-Bz                                             | -4.09         | -21.13   | 33.66     | -1.38        | -9.79      |
| 16.    | Pyridine-Bz                                       | -5.05         | -21.11   | 33.99     | -1.44        | -9.77      |
| 17.    | Li <sup>+</sup> -C <sub>2</sub> H <sub>6</sub>    | -3.59         | -3.74    | 10.98     | -18.87       | -0.56      |
| 18.    | Li <sup>+</sup> -CH <sub>4</sub>                  | -4.44         | -2.89    | 8.63      | -13.08       | -0.49      |
| 19.    | CH <sub>3</sub> NH <sub>2</sub> -I <sub>2</sub>   | -58.59        | -49.03   | 94.93     | -23.66       | -3.49      |
| 20.    | (CH <sub>3</sub> ) <sub>3</sub> N-I <sub>2</sub>  | -74.32        | -79.26   | 152.18    | -30.51       | -9.42      |
| 21.    | C <sub>2</sub> H <sub>2</sub> -ClCN               | -2.57         | -3.65    | 6.39      | -0.57        | -0.78      |
| 22.    | H <sub>3</sub> N-ClCN                             | -6.99         | -7.01    | 12.45     | -1.48        | -0.38      |
| 23.    | LiH-ClCF <sub>3</sub>                             | -5.38         | -6.68    | 11.61     | -1.53        | -0.68      |
| 24.    | C <sub>2</sub> H <sub>4</sub> -CH <sub>3</sub> CN | -1.20         | -2.42    | 3.97      | -0.20        | -0.92      |
| 25.    | LiF-CH <sub>3</sub> F                             | -5.79         | -4.18    | 6.94      | -1.12        | 0.36       |
| 26.    | H <sub>2</sub> O-CH <sub>3</sub> OH               | -1.60         | -2.43    | 3.94      | -0.30        | -0.42      |
| 27.    | FH <sub>2</sub> P- NH <sub>2</sub> F              | -14.00        | -21.91   | 38.94     | -5.02        | -2.40      |
| 28.    | FH <sub>2</sub> P- NH <sub>2</sub> Me             | -24.61        | -39.11   | 70.52     | -10.71       | -3.48      |
| 29.    | F(Me)S-NH <sub>3</sub>                            | -11.45        | -16.61   | 28.72     | -3.47        | -1.34      |
| 30.    | OH(Me)S-NH <sub>3</sub>                           | -5.33         | -7.52    | 12.44     | -1.07        | -1.09      |
| 31.    | CN(H <sub>3</sub> )Si- CN(H <sub>3</sub> )Si      | -7.79         | -11.92   | 20.23     | -2.44        | -2.75      |
| 32.    | NC(H <sub>3</sub> )Si- NC(H <sub>3</sub> )Si      | -6.24         | -7.24    | 12.24     | -1.59        | -0.94      |
| 33.    | C <sub>2</sub> H <sub>4</sub> -LiF                | -10.57        | -3.95    | 10.82     | -5.01        | 0.77       |
| 34.    | H <sub>2</sub> O-LiF                              | -21.07        | -4.43    | 11.94     | -4.37        | 1.71       |
| 35.    | NH <sub>3</sub> -LiF                              | -26.73        | -6.49    | 17.83     | -5.39        | 1.34       |
| 36.    | He <sub>2</sub>                                   | 0.00          | 0.00     | 0.01      | 0.00         | 0.00       |
| 37.    | Ne <sub>2</sub>                                   | -0.01         | -0.06    | 0.12      | 0.00         | 0.00       |
| 38.    | Ar <sub>2</sub>                                   | -0.03         | -0.20    | 0.32      | 0.00         | -0.06      |
| 39.    | Propen2                                           | -0.77         | -4.23    | 6.65      | -0.21        | -2.58      |
| 40.    | DHB-Me                                            | -19.86        | -23.68   | 40.91     | -6.29        | -5.43      |
| 41.    | DHB-Et                                            | -19.46        | -24.11   | 41.46     | -6.22        | -5.78      |
| 42.    | HBeCHN(H)-Be(H)CHN(H)                             | -63.16        | -65.08   | 125.90    | -34.93       | 0.10       |
| 43.    | FBeCHN(H)-Be(F)CHN(H)                             | -60.58        | -54.12   | 108.66    | -34.27       | 2.96       |

**Table S11 (b):** Contribution of interaction energy components (in %) at MP2/6-311++G\*\* level using LMO-EDA approach for the non-covalent systems.

| S. No. | Non-covalent                                      | Electrostatic | Exchange | Polarization | Dispersion |
|--------|---------------------------------------------------|---------------|----------|--------------|------------|
| 1.     | H <sub>2</sub> O-H <sub>2</sub> O                 | 44.44         | 42.97    | 11.12        | 1.47       |
| 2.     | NH <sub>3</sub> - NH <sub>3</sub>                 | 36.83         | 48.48    | 9.51         | 5.18       |
| 3.     | NH <sub>3</sub> - NH <sub>4</sub> <sup>+</sup>    | 37.08         | 36.57    | 23.94        | 2.41       |
| 4.     | H <sub>2</sub> O- NH <sub>4</sub> <sup>+</sup>    | 46.90         | 32.45    | 19.32        | 1.33       |
| 5.     | H <sub>2</sub> O-Li <sup>+</sup>                  | 71.17         | 11.37    | 21.71        | -4.25      |
| 6.     | NH <sub>3</sub> -Li <sup>+</sup>                  | 69.20         | 12.35    | 20.89        | -2.44      |
| 7.     | C <sub>2</sub> H <sub>2</sub> -HCN                | 39.67         | 43.71    | 12.35        | 4.28       |
| 8.     | C <sub>2</sub> H <sub>2</sub> -HNC                | 34.14         | 42.98    | 14.81        | 8.07       |
| 9.     | NH <sub>3</sub> -C <sub>2</sub> H <sub>4</sub>    | 29.34         | 51.01    | 5.92         | 13.73      |
| 10.    | CH <sub>4</sub> -Bz                               | 12.43         | 58.53    | 3.85         | 25.19      |
| 11.    | NH <sub>3</sub> -Bz                               | 20.35         | 52.65    | 5.79         | 21.22      |
| 12.    | H <sub>2</sub> O-CNBz                             | 37.66         | 43.55    | 6.66         | 12.14      |
| 13.    | Cl <sup>-</sup> -FBz                              | 36.78         | 47.14    | 11.64        | 4.45       |
| 14.    | Li <sup>+</sup> -Bz                               | 31.41         | 10.33    | 53.06        | 5.20       |
| 15.    | Bz-Bz                                             | 11.24         | 58.07    | 3.79         | 26.90      |
| 16.    | Pyridine-Bz                                       | 13.51         | 56.49    | 3.85         | 26.14      |
| 17.    | Li <sup>+</sup> -C <sub>2</sub> H <sub>6</sub>    | 13.42         | 13.98    | 70.52        | 2.09       |
| 18.    | Li <sup>+</sup> -CH <sub>4</sub>                  | 21.24         | 13.83    | 62.58        | 2.34       |
| 19.    | CH <sub>3</sub> NH <sub>2</sub> -I <sub>2</sub>   | 43.47         | 36.38    | 17.56        | 2.59       |
| 20.    | (CH <sub>3</sub> ) <sub>3</sub> N-I <sub>2</sub>  | 38.41         | 40.96    | 15.77        | 4.87       |
| 21.    | C <sub>2</sub> H <sub>2</sub> -ClCN               | 33.95         | 48.22    | 7.53         | 10.30      |
| 22.    | H <sub>3</sub> N-ClCN                             | 44.07         | 44.20    | 9.33         | 2.40       |
| 23.    | LiH-ClCF <sub>3</sub>                             | 37.70         | 46.81    | 10.72        | 4.77       |
| 24.    | C <sub>2</sub> H <sub>4</sub> -CH <sub>3</sub> CN | 25.32         | 51.05    | 4.22         | 19.41      |
| 25.    | LiF-CH <sub>3</sub> F                             | 53.96         | 38.96    | 10.44        | -3.36      |
| 26.    | H <sub>2</sub> O-CH <sub>3</sub> OH               | 33.68         | 51.16    | 6.32         | 8.84       |
| 27.    | FH <sub>2</sub> P- NH <sub>2</sub> F              | 32.31         | 50.57    | 11.59        | 5.54       |
| 28.    | FH <sub>2</sub> P- NH <sub>2</sub> Me             | 31.59         | 50.20    | 13.75        | 4.47       |
| 29.    | F(Me)S-NH <sub>3</sub>                            | 34.83         | 50.53    | 10.56        | 4.08       |
| 30.    | OH(Me) <sub>3</sub> S-NH <sub>3</sub>             | 35.51         | 50.10    | 7.13         | 7.26       |
| 31.    | CN(H <sub>3</sub> )Si- CN(H <sub>3</sub> )Si      | 31.29         | 47.87    | 9.80         | 11.04      |
| 32.    | NC(H <sub>3</sub> )Si- NC(H <sub>3</sub> )Si      | 38.98         | 45.22    | 9.93         | 5.87       |
| 33.    | C <sub>2</sub> H <sub>4</sub> -LiF                | 56.34         | 21.06    | 26.71        | -4.10      |
| 34.    | H <sub>2</sub> O-LiF                              | 74.82         | 15.73    | 15.52        | -6.07      |
| 35.    | NH <sub>3</sub> -LiF                              | 71.72         | 17.41    | 14.46        | -3.60      |
| 36.    | He <sub>2</sub>                                   | 0.00          | 0.00     | 0.00         | 0.00       |
| 37.    | Ne <sub>2</sub>                                   | 14.29         | 85.71    | 0.00         | 0.00       |
| 38.    | Ar <sub>2</sub>                                   | 10.34         | 68.97    | 0.00         | 20.69      |
| 39.    | Propen2                                           | 9.88          | 54.30    | 2.70         | 33.12      |
| 40.    | DHB-Me                                            | 35.94         | 42.85    | 11.38        | 9.83       |
| 41.    | DHB-Et                                            | 35.02         | 43.39    | 11.19        | 10.40      |
| 42.    | HBeCHN(H)-Be(H)CHN(H)                             | 38.73         | 39.91    | 21.42        | -0.06      |
| 43.    | FBeCHN(H)-Be(F)CHN(H)                             | 41.49         | 37.07    | 23.47        | -2.03      |

**Table S11 (c):** SAPT energy (kcal/mol) calculations at SAPT2+3(CCD)dmp2 using 6-311++G\*\* basis set are carried out with PSI4 for the non-covalent systems.

| S. No. | Non-covalent                                      | Electrostatic | Exchange | Polarization | Dispersion |
|--------|---------------------------------------------------|---------------|----------|--------------|------------|
| 1.     | H <sub>2</sub> O-H <sub>2</sub> O                 | -8.75         | 6.70     | -2.09        | -1.32      |
| 2.     | NH <sub>3</sub> - NH <sub>3</sub>                 | -5.69         | 5.19     | -1.40        | -1.25      |
| 3.     | NH <sub>3</sub> - NH <sub>4</sub> <sup>+</sup>    | -39.54        | 37.48    | -23.08       | -4.74      |
| 4.     | H <sub>2</sub> O- NH <sub>4</sub> <sup>+</sup>    | -26.42        | 17.55    | -10.40       | -2.63      |
| 5.     | H <sub>2</sub> O-Li <sup>+</sup>                  | -35.97        | 11.15    | -10.85       | -0.32      |
| 6.     | NH <sub>3</sub> -Li <sup>+</sup>                  | -43.07        | 15.53    | -12.71       | -0.35      |
| 7.     | C <sub>2</sub> H <sub>2</sub> -HCN                | -3.34         | 2.90     | -1.02        | -1.06      |
| 8.     | C <sub>2</sub> H <sub>2</sub> -HNC                | -5.38         | 5.67     | -2.24        | -1.66      |
| 9.     | NH <sub>3</sub> -C <sub>2</sub> H <sub>4</sub>    | -2.03         | 2.35     | -0.40        | -1.15      |
| 10.    | CH <sub>4</sub> -Bz                               | -1.13         | 2.88     | -0.33        | -2.50      |
| 11.    | NH <sub>3</sub> -Bz                               | -2.11         | 3.28     | -0.57        | -2.56      |
| 12.    | H <sub>2</sub> O-CNBz*                            | -5.42         | 3.90     | -0.92        | -2.87      |
| 13.    | Cl <sup>-</sup> -FBz*                             | -20.54        | 16.48    | -5.45        | -5.28      |
| 14.    | Li <sup>+</sup> -Bz                               | -18.94        | 11.94    | -31.72       | -0.73      |
| 15.    | Bz-Bz*                                            | -4.11         | 12.37    | -1.11        | -9.76      |
| 16.    | Pyridine-Bz*                                      | -5.08         | 12.71    | -1.17        | -9.87      |
| 17.    | Li <sup>+</sup> -C <sub>2</sub> H <sub>6</sub>    | -3.58         | 7.25     | -18.80       | -0.40      |
| 18.    | Li <sup>+</sup> -CH <sub>4</sub>                  | -4.45         | 5.73     | -13.03       | -0.27      |
| 19.    | CH <sub>3</sub> NH <sub>2</sub> -I <sub>2</sub>   | -             | -        | -            | -          |
| 20.    | (CH <sub>3</sub> ) <sub>3</sub> N-I <sub>2</sub>  | -             | -        | -            | -          |
| 21.    | C <sub>2</sub> H <sub>2</sub> -ClCN               | -2.58         | 2.73     | -0.53        | -1.12      |
| 22.    | H <sub>3</sub> N-ClCN                             | -7.01         | 5.41     | -1.34        | -1.24      |
| 23.    | LiH-ClCF <sub>3</sub>                             | -5.40         | 4.90     | -1.33        | -1.04      |
| 24.    | C <sub>2</sub> H <sub>4</sub> -CH <sub>3</sub> CN | -1.20         | 1.54     | -0.19        | -1.12      |
| 25.    | LiF-CH <sub>3</sub> F                             | -5.79         | 2.74     | -1.09        | -0.81      |
| 26.    | H <sub>2</sub> O-CH <sub>3</sub> OH               | -1.60         | 1.50     | -0.29        | -0.74      |
| 27.    | FH <sub>2</sub> P- NH <sub>2</sub> F              | -14.02        | 16.74    | -4.07        | -3.17      |
| 28.    | FH <sub>2</sub> P- NH <sub>2</sub> Me             | -24.63        | 30.56    | -7.49        | -5.34      |
| 29.    | F(Me)S-NH <sub>3</sub>                            | -11.46        | 11.94    | -2.94        | -2.73      |
| 30.    | OH(Me)S-NH <sub>3</sub>                           | -5.33         | 4.87     | -0.99        | -1.79      |
| 31.    | CN(H <sub>3</sub> )Si- CN(H <sub>3</sub> )Si      | -7.79         | 8.20     | -2.17        | -2.27      |
| 32.    | NC(H <sub>3</sub> )Si- NC(H <sub>3</sub> )Si      | -6.24         | 4.95     | -1.52        | -1.91      |
| 33.    | C <sub>2</sub> H <sub>4</sub> -LiF                | -10.56        | 6.89     | -4.89        | -0.62      |
| 34.    | H <sub>2</sub> O-LiF                              | -21.02        | 7.37     | -4.29        | -0.48      |
| 35.    | NH <sub>3</sub> -LiF                              | -26.67        | 11.19    | -5.20        | -0.60      |
| 36.    | He <sub>2</sub>                                   | -0.003        | 0.004    | 0.001        | -0.005     |
| 37.    | Ne <sub>2</sub>                                   | -0.012        | 0.057    | 0.000        | -0.016     |
| 38.    | Ar <sub>2</sub>                                   | -0.035        | 0.120    | -0.004       | -0.074     |
| 39.    | Propen2                                           | -0.77         | 2.41     | -0.20        | -2.78      |
| 40.    | DHB-Me                                            | -19.87        | 16.97    | -5.90        | -6.26      |
| 41.    | DHB-Et                                            | -19.47        | 17.08    | -5.83        | -6.77      |
| 42.    | HBeCHN(H)-Be(H)CHN(H)                             | -62.85        | 58.68    | -26.39       | -9.55      |
| 43.    | FBeCHN(H)-Be(F)CHN(H)                             | -60.33        | 53.00    | -27.93       | -8.27      |

\*Many-body treatments of dispersion on coupled-cluster doubles (CCD) method and  $\delta$ MP2 corrections using dmp2 are not done. SAPT2+3(CCD)dmp2 energetics for CH<sub>3</sub>NH<sub>2</sub>-I<sub>2</sub> and (CH<sub>3</sub>)<sub>3</sub>N-I<sub>2</sub> is not obtained with PSI4 package using DGDZVP basis set for iodine.

**Table S12:** The variation of electron density ( $\rho$ ), Laplacian of electron density ( $\nabla^2\rho$ ),  $H(\mathbf{r})$ , and  $[-G(\mathbf{r})/V(\mathbf{r})]$  as obtained at a bond critical point for the covalent bonds, obtained at MP2, B3LYP, and M05-2X using 6-311++G\*\* basis set. These all values are given in a.u.

| S. No. | Covalent                      | $\rho$ |        |        | $\nabla^2\rho$ |         |         | $H(\mathbf{r})$ |         |         | $G(\mathbf{r})/v(\mathbf{r})$ |        |        |
|--------|-------------------------------|--------|--------|--------|----------------|---------|---------|-----------------|---------|---------|-------------------------------|--------|--------|
|        |                               | MP2    | B3LYP  | M05-2X | MP2            | B3LYP   | M05-2X  | MP2             | B3LYP   | M05-2X  | MP2                           | B3LYP  | M05-2X |
| 1.     | H <sub>2</sub>                | 0.2636 | 0.2648 | 0.2663 | -1.0742        | -1.0846 | -1.1020 | -0.2743         | -0.2711 | -0.2755 | 0.0205                        | 0.0000 | 0.0000 |
| 2.     | N <sub>2</sub>                | 0.6372 | 0.6433 | 0.6484 | -2.1834        | -2.2471 | -2.3203 | -1.1030         | -1.0963 | -1.1161 | 0.3356                        | 0.3278 | 0.3244 |
| 3.     | O <sub>2</sub>                | 0.5096 | 0.5141 | 0.5165 | -0.5499        | -0.6409 | -0.6914 | -0.6181         | -0.6006 | -0.6132 | 0.4374                        | 0.4230 | 0.4180 |
| 4.     | Cl <sub>2</sub>               | 0.1424 | 0.1426 | 0.1437 | -0.0035        | 0.0060  | -0.0069 | -0.0648         | -0.0603 | -0.0624 | 0.4966                        | 0.5061 | 0.4930 |
| 5.     | HF                            | 0.3704 | 0.3757 | 0.3719 | -2.8355        | -2.8776 | -2.8791 | -0.8039         | -0.8052 | -0.8039 | 0.1057                        | 0.0962 | 0.0947 |
| 6.     | HCl                           | 0.2487 | 0.2494 | 0.2503 | -0.7106        | -0.7032 | -0.7289 | -0.2381         | -0.2310 | -0.2353 | 0.2024                        | 0.1928 | 0.1841 |
| 7.     | FCI                           | 0.1809 | 0.1846 | 0.1859 | 0.0634         | 0.0514  | 0.0126  | -0.1155         | -0.1131 | -0.1223 | 0.5321                        | 0.5269 | 0.5064 |
| 8.     | BH <sub>3</sub>               | 0.1807 | 0.1840 | 0.1856 | -0.2530        | -0.3432 | -0.3408 | -0.1950         | -0.1968 | -0.2014 | 0.4032                        | 0.3606 | 0.3659 |
| 9.     | NH <sub>3</sub>               | 0.3335 | 0.3361 | 0.3357 | -1.5289        | -1.4832 | -1.5089 | -0.4510         | -0.4320 | -0.4374 | 0.1323                        | 0.1241 | 0.1209 |
| 10.    | CH <sub>4</sub>               | 0.2719 | 0.2724 | 0.2730 | -0.9106        | -0.9003 | -0.9176 | -0.2765         | -0.2687 | -0.2723 | 0.1502                        | 0.1397 | 0.1360 |
| 11.    | H <sub>2</sub> O              | 0.3646 | 0.3695 | 0.3674 | -2.5173        | -2.5234 | -2.5377 | -0.7133         | -0.7074 | -0.7092 | 0.1053                        | 0.0977 | 0.0953 |
| 12.    | PH <sub>3</sub>               | 0.1619 | 0.1639 | 0.1643 | 0.0623         | -0.0295 | -0.0095 | -0.1564         | -0.1587 | -0.1601 | 0.5237                        | 0.4881 | 0.4963 |
| 13.    | H <sub>2</sub> S              | 0.2181 | 0.2184 | 0.2194 | -0.6744        | -0.6565 | -0.6711 | -0.2324         | -0.2194 | -0.2214 | 0.2154                        | 0.2013 | 0.1950 |
| 14.    | BCl <sub>3</sub>              | 0.1529 | 0.1549 | 0.1552 | 0.0036         | -0.0496 | -0.0434 | -0.1470         | -0.1464 | -0.1472 | 0.5015                        | 0.4779 | 0.4809 |
| 15.    | NCl <sub>3</sub>              | 0.1872 | 0.1886 | 0.1896 | -0.0904        | -0.0859 | -0.1098 | -0.1179         | -0.1121 | -0.1149 | 0.4470                        | 0.4470 | 0.4322 |
| 16.    | OCl <sub>2</sub>              | 0.1816 | 0.1850 | 0.1858 | 0.0116         | 0.0009  | -0.0275 | -0.1109         | -0.1084 | -0.1133 | 0.5064                        | 0.5005 | 0.4843 |
| 17.    | PCl <sub>3</sub>              | 0.1292 | 0.1298 | 0.1295 | -0.1980        | -0.1784 | -0.1867 | -0.1067         | -0.0975 | -0.1014 | 0.3491                        | 0.3518 | 0.3505 |
| 18.    | SCl <sub>2</sub>              | 0.1395 | 0.1397 | 0.1404 | -0.0641        | -0.0532 | -0.0663 | -0.0729         | -0.0691 | -0.0711 | 0.4382                        | 0.4468 | 0.4340 |
| 19.    | CCl <sub>4</sub>              | 0.1953 | 0.1947 | 0.1958 | -0.2452        | -0.2326 | -0.2506 | -0.1338         | -0.1253 | -0.1279 | 0.3515                        | 0.3490 | 0.3379 |
| 20.    | C <sub>2</sub> H <sub>6</sub> | 0.2393 | 0.2383 | 0.2369 | -0.5557        | -0.5339 | -0.5294 | -0.2001         | -0.1881 | -0.1869 | 0.2341                        | 0.2250 | 0.2260 |
| 21.    | C <sub>2</sub> H <sub>4</sub> | 0.3346 | 0.3371 | 0.3371 | -0.9757        | -0.9859 | -0.9963 | -0.3862         | -0.3795 | -0.3811 | 0.2692                        | 0.2596 | 0.2573 |
| 22.    | C <sub>2</sub> H <sub>2</sub> | 0.3896 | 0.3979 | 0.4016 | -1.0922        | -1.1510 | -1.2129 | -0.5478         | -0.5553 | -0.5672 | 0.3340                        | 0.3252 | 0.3176 |
| 23.    | CH <sub>3</sub> OH            | 0.2509 | 0.2532 | 0.2511 | -0.4171        | -0.4701 | -0.4219 | -0.3434         | -0.3308 | -0.3328 | 0.4105                        | 0.3920 | 0.4058 |
| 24.    | CH <sub>3</sub> SH            | 0.1794 | 0.1786 | 0.1784 | -0.2963        | -0.2787 | -0.2814 | -0.1254         | -0.1171 | -0.1173 | 0.2905                        | 0.2883 | 0.2858 |

**Table S13:** The variation of electron density ( $\rho$ ), Laplacian of electron density ( $\nabla^2\rho$ ),  $H(\mathbf{r})$ , and  $[-G(\mathbf{r})/V(\mathbf{r})]$  as obtained at a bond critical point for the ionic and coordinate bonds, obtained at MP2, B3LYP and M05-2X using 6-311++G\*\* basis set. These all values are given in a.u.

| S. No.            | Ionic                                              | $\rho$ |        |        | $\nabla^2\rho$ |        |        | $H(\mathbf{r})$ |         |         | $G(\mathbf{r})/v(\mathbf{r})$ |        |        |
|-------------------|----------------------------------------------------|--------|--------|--------|----------------|--------|--------|-----------------|---------|---------|-------------------------------|--------|--------|
|                   |                                                    | MP2    | B3LYP  | M05-2X | MP2            | B3LYP  | M05-2X | MP2             | B3LYP   | M05-2X  | MP2                           | B3LYP  | M05-2X |
| 25.               | NaCl                                               | 0.0325 | 0.0332 | 0.0336 | 0.1903         | 0.1815 | 0.1832 | 0.0047          | 0.0043  | 0.0040  | 1.1242                        | 1.1172 | 1.1048 |
| 26.               | LiH                                                | 0.0392 | 0.0393 | 0.0384 | 0.1665         | 0.1594 | 0.0000 | -0.0001         | -0.0002 | 0.0004  | 0.9981                        | 0.9939 | 1.0108 |
| 27.               | NaH                                                | 0.0314 | 0.0317 | 0.0313 | 0.1314         | 0.1229 | 0.1616 | 0.0014          | 0.0015  | 0.0015  | 1.0481                        | 1.0524 | 1.0528 |
| 28.               | KH                                                 | 0.0295 | 0.0299 | 0.0294 | 0.0803         | 0.0752 | 0.2209 | -0.0010         | -0.0008 | -0.0008 | 0.9562                        | 0.9588 | 0.9621 |
| 29.               | CaS                                                | 0.0634 | 0.0672 | 0.0679 | 0.2036         | 0.2032 | 0.1116 | -0.0107         | -0.0112 | -0.0123 | 0.8516                        | 0.8472 | 0.8350 |
| 30.               | AlN                                                | 0.1093 | 0.1012 | 0.0985 | 0.8412         | 0.7940 | 0.2004 | -0.0176         | -0.0111 | -0.0106 | 0.9284                        | 0.9498 | 0.9515 |
| 31.               | MgCl <sub>2</sub>                                  | 0.0522 | 0.0534 | 0.0534 | 0.3089         | 0.2936 | 0.2954 | 0.0020          | 0.0010  | 0.0008  | 1.0269                        | 1.0137 | 1.0110 |
| 32.               | MgH <sub>2</sub>                                   | 0.0521 | 0.0531 | 0.0522 | 0.2346         | 0.2178 | 0.1229 | -0.0026         | -0.0033 | -0.0027 | 0.9599                        | 0.9462 | 0.9556 |
| 33.               | CaH <sub>2</sub>                                   | 0.0454 | 0.0470 | 0.0457 | 0.1207         | 0.1083 | 0.0754 | -0.0058         | -0.0061 | -0.0056 | 0.8619                        | 0.8443 | 0.8565 |
| <b>Coordinate</b> |                                                    |        |        |        |                |        |        |                 |         |         |                               |        |        |
| 34.               | NH <sub>3</sub> -BH <sub>3</sub>                   | 0.0987 | 0.1010 | 0.0991 | 0.4777         | 0.4278 | 0.4608 | -0.0550         | -0.0584 | -0.0550 | 0.7602                        | 0.7390 | 0.7558 |
| 35.               | NH <sub>3</sub> -BF <sub>3</sub>                   | 0.1090 | 0.1132 | 0.1107 | 0.2750         | 0.1911 | 0.2275 | -0.0778         | -0.0841 | -0.0796 | 0.6533                        | 0.6106 | 0.6316 |
| 36.               | PH <sub>3</sub> -BH <sub>3</sub>                   | 0.1025 | 0.1036 | 0.1017 | 0.1212         | 0.0659 | 0.0978 | -0.0819         | -0.0818 | -0.0791 | 0.5781                        | 0.5457 | 0.5669 |
| 37.               | PH <sub>3</sub> -AlH <sub>3</sub>                  | 0.0327 | 0.0343 | 0.0339 | 0.0910         | 0.0783 | 0.0815 | -0.0063         | -0.0074 | -0.0072 | 0.8219                        | 0.7844 | 0.7934 |
| 38.               | H <sub>2</sub> S-BH <sub>3</sub>                   | 0.0765 | 0.0779 | 0.0760 | 0.1829         | 0.1325 | 0.1683 | -0.0526         | -0.0534 | -0.0509 | 0.6515                        | 0.6183 | 0.6463 |
| 39.               | H <sub>2</sub> S-AlH <sub>3</sub>                  | 0.0286 | 0.0303 | 0.0300 | 0.0871         | 0.0762 | 0.0795 | -0.0043         | -0.0055 | -0.0052 | 0.8581                        | 0.8179 | 0.8272 |
| 40.               | CO-BH <sub>3</sub>                                 | 0.1288 | 0.1328 | 0.1293 | 0.5631         | 0.4952 | 0.5305 | -0.0889         | -0.0951 | -0.0896 | 0.7210                        | 0.6971 | 0.7126 |
| 41.               | (CH <sub>3</sub> )NH <sub>2</sub> -BH <sub>3</sub> | 0.1057 | 0.1081 | 0.1061 | 0.4801         | 0.4285 | 0.4623 | -0.0630         | -0.0664 | -0.0627 | 0.7439                        | 0.7233 | 0.7397 |
| 42.               | HF-BH <sub>3</sub>                                 | 0.0186 | 0.0193 | 0.0190 | 0.0626         | 0.0602 | 0.0634 | -0.0012         | -0.0013 | -0.0012 | 0.9340                        | 0.9280 | 0.9337 |

**Table S14:** The variation of electron density ( $\rho$ ), Laplacian of electron density ( $\nabla^2\rho$ ),  $H(\mathbf{r})$ , and  $[-G(\mathbf{r})/V(\mathbf{r})]$  as obtained at a critical point for the non-covalent bonds, obtained at MP2, B3LYP and M05-2X using 6-311++G\*\* basis set. These all values are given in a.u.

| S. No. | Non-covalent                                      | $\rho$ |        |        | $\nabla^2\rho$ |        |        | $H(\mathbf{r})$ |         |         | $G(\mathbf{r})/v(\mathbf{r})$ |        |        |
|--------|---------------------------------------------------|--------|--------|--------|----------------|--------|--------|-----------------|---------|---------|-------------------------------|--------|--------|
|        |                                                   | MP2    | B3LYP  | M05-2X | MP2            | B3LYP  | M05-2X | MP2             | B3LYP   | M052X   | MP2                           | B3LYP  | M05-2X |
| 1.     | H <sub>2</sub> O-H <sub>2</sub> O                 | 0.0231 | 0.0236 | 0.0228 | 0.0911         | 0.0898 | 0.0937 | 0.0023          | 0.0025  | 0.0028  | 1.1285                        | 1.1449 | 1.1590 |
| 2.     | NH <sub>3</sub> -NH <sub>3</sub>                  | 0.0158 | 0.0160 | 0.0157 | 0.0489         | 0.0478 | 0.0500 | 0.0015          | 0.0017  | 0.0018  | 1.1674                        | 1.2003 | 1.2050 |
| 3.     | NH <sub>3</sub> -NH <sub>4</sub> <sup>+</sup>     | 0.0420 | 0.0780 | 0.0774 | 0.0915         | 0.0619 | 0.0584 | -0.0060         | -0.0295 | -0.0302 | 0.8280                        | 0.6038 | 0.5974 |
| 4.     | H <sub>2</sub> O-NH <sub>4</sub> <sup>+</sup>     | 0.0484 | 0.0497 | 0.0487 | 0.1454         | 0.1428 | 0.1470 | -0.0064         | -0.0061 | -0.0060 | 0.8700                        | 0.8726 | 0.8767 |
| 5.     | H <sub>2</sub> O-Li <sup>+</sup>                  | 0.0328 | 0.0336 | 0.0336 | 0.2652         | 0.2598 | 0.2644 | 0.0124          | 0.0121  | 0.0122  | 1.2999                        | 1.2954 | 1.2923 |
| 6.     | NH <sub>3</sub> -Li <sup>+</sup>                  | 0.0321 | 0.0329 | 0.0328 | 0.2001         | 0.1934 | 0.1968 | 0.0071          | 0.0066  | 0.0067  | 1.1998                        | 1.1874 | 1.1862 |
| 7.     | C <sub>2</sub> H <sub>2</sub> -HCN                | 0.0080 | 0.0082 | 0.0081 | 0.0230         | 0.0223 | 0.0222 | 0.0012          | 0.0013  | 0.0013  | 1.3809                        | 1.4418 | 1.4324 |
| 8.     | C <sub>2</sub> H <sub>2</sub> -HNC                | 0.0133 | 0.0138 | 0.0135 | 0.0415         | 0.0405 | 0.0420 | 0.0024          | 0.0024  | 0.0025  | 1.4162                        | 1.4579 | 1.4674 |
| 9.     | NH <sub>3</sub> -C <sub>2</sub> H <sub>4</sub>    | 0.0064 | 0.0065 | 0.0065 | 0.0192         | 0.0186 | 0.0189 | 0.0009          | 0.0009  | 0.0009  | 1.2862                        | 1.3287 | 1.2965 |
| 10.    | CH <sub>4</sub> -Bz                               | 0.0047 | 0.0046 | 0.0048 | 0.0190         | 0.0186 | 0.0187 | 0.0007          | 0.0007  | 0.0006  | 1.2074                        | 1.2322 | 1.1913 |
| 11.    | NH <sub>3</sub> -Bz                               | 0.0049 | 0.0048 | 0.0050 | 0.0193         | 0.0190 | 0.0190 | 0.0007          | 0.0008  | 0.0007  | 1.2113                        | 1.2444 | 1.2057 |
| 12.    | H <sub>2</sub> O-CNbz                             | 0.0051 | 0.0049 | 0.0053 | 0.0237         | 0.0232 | 0.0241 | 0.0010          | 0.0011  | 0.0010  | 1.2624                        | 1.3001 | 1.2575 |
| 13.    | Cl <sup>-</sup> -FBz                              | 0.0068 | 0.0065 | 0.0070 | 0.0279         | 0.0279 | 0.0282 | 0.0013          | 0.0014  | 0.0012  | 1.2806                        | 1.3223 | 1.2712 |
| 14.    | Li <sup>+</sup> -Bz                               | 0.0131 | 0.0132 | 0.0138 | 0.0711         | 0.0697 | 0.0718 | 0.0019          | 0.0020  | 0.0017  | 1.1351                        | 1.1493 | 1.1177 |
| 15.    | Bz-Bz                                             | 0.0040 | 0.0038 | 0.0075 | 0.0145         | 0.0143 | 0.0198 | 0.0005          | 0.0006  | 0.0008  | 1.1922                        | 1.2258 | 1.2276 |
| 16.    | Pyridine-Bz                                       | 0.0043 | 0.0041 | 0.0044 | 0.0158         | 0.0156 | 0.0164 | 0.0006          | 0.0006  | 0.0006  | 1.1957                        | 1.2307 | 1.1976 |
| 17.    | Li <sup>+</sup> -C <sub>2</sub> H <sub>6</sub>    | 0.0188 | 0.0195 | 0.0198 | 0.1239         | 0.1186 | 0.1216 | 0.0050          | 0.0046  | 0.0045  | 1.2358                        | 1.2215 | 1.2124 |
| 18.    | Li <sup>+</sup> -CH <sub>4</sub>                  | 0.0181 | 0.0189 | 0.0190 | 0.1151         | 0.1103 | 0.1131 | 0.0047          | 0.0043  | 0.0043  | 1.2440                        | 1.2251 | 1.2211 |
| 19.    | CH <sub>3</sub> NH <sub>2</sub> -I <sub>2</sub>   | 0.0402 | 0.0406 | 0.0403 | 0.0915         | 0.0912 | 0.0908 | -0.0037         | -0.0031 | -0.0036 | 0.8784                        | 0.8943 | 0.8805 |
| 20.    | (CH <sub>3</sub> ) <sub>3</sub> N-I <sub>2</sub>  | 0.0492 | 0.0490 | 0.0492 | 0.0979         | 0.1004 | 0.0972 | -0.0071         | -0.0060 | -0.0070 | 0.8168                        | 0.8391 | 0.8172 |
| 21.    | C <sub>2</sub> H <sub>2</sub> -ClCN               | 0.0060 | 0.0062 | 0.0063 | 0.0220         | 0.0216 | 0.0219 | 0.0013          | 0.0012  | 0.0012  | 1.4216                        | 1.4293 | 1.3968 |
| 22.    | H <sub>3</sub> N-ClCN                             | 0.0127 | 0.0129 | 0.0130 | 0.0456         | 0.0442 | 0.0451 | 0.0014          | 0.0014  | 0.0013  | 1.1590                        | 1.1770 | 1.1529 |
| 23.    | LiH-ClCF <sub>3</sub>                             | 0.0083 | 0.0084 | 0.0086 | 0.0255         | 0.0239 | 0.0234 | 0.0009          | 0.0009  | 0.0008  | 1.2123                        | 1.2265 | 1.1844 |
| 24.    | C <sub>2</sub> H <sub>4</sub> -CH <sub>3</sub> CN | 0.0035 | 0.0036 | 0.0037 | 0.0110         | 0.0108 | 0.0112 | 0.0006          | 0.0006  | 0.0006  | 1.3785                        | 1.3959 | 1.3720 |
| 25.    | LiF-CH <sub>3</sub> F                             | 0.0087 | 0.0088 | 0.0089 | 0.0452         | 0.0441 | 0.0454 | 0.0017          | 0.0017  | 0.0018  | 1.2220                        | 1.2313 | 1.2247 |
| 26.    | H <sub>2</sub> O-CH <sub>3</sub> OH               | 0.0060 | 0.0061 | 0.0062 | 0.0295         | 0.0290 | 0.0298 | 0.0014          | 0.0014  | 0.0014  | 1.3102                        | 1.3219 | 1.3102 |
| 27.    | FH <sub>2</sub> P-NH <sub>2</sub> F               | 0.0238 | 0.0245 | 0.0240 | 0.0620         | 0.0606 | 0.0628 | -0.0003         | 0.0000  | -0.0001 | 0.9835                        | 0.9991 | 0.9921 |
| 28.    | FH <sub>2</sub> P-NH <sub>2</sub> Me              | 0.0319 | 0.0329 | 0.0326 | 0.0691         | 0.0676 | 0.0690 | -0.0024         | -0.0021 | -0.0025 | 0.8896                        | 0.9015 | 0.8884 |
| 29.    | F(Me)S-NH <sub>3</sub>                            | 0.0181 | 0.0185 | 0.0184 | 0.0536         | 0.0520 | 0.0535 | 0.0007          | 0.0009  | 0.0007  | 1.0558                        | 1.0802 | 1.0607 |
| 30.    | OH(Me)S-NH <sub>3</sub>                           | 0.0086 | 0.0087 | 0.0088 | 0.0281         | 0.0274 | 0.0281 | 0.0008          | 0.0009  | 0.0008  | 1.1437                        | 1.1648 | 1.1446 |
| 31.    | CN(H <sub>3</sub> )Si-CN(H <sub>3</sub> )Si       | 0.0114 | 0.0118 | 0.0117 | 0.0305         | 0.0301 | 0.0308 | 0.0007          | 0.0008  | 0.0007  | 1.1046                        | 1.1302 | 1.1064 |
| 32.    | NC(H <sub>3</sub> )Si-NC(H <sub>3</sub> )Si       | 0.0096 | 0.0099 | 0.0099 | 0.0290         | 0.0290 | 0.0296 | 0.0008          | 0.0009  | 0.0008  | 1.1350                        | 1.1628 | 1.1400 |
| 33.    | C <sub>2</sub> H <sub>4</sub> -LiF                | 0.0135 | 0.0140 | 0.0143 | 0.0575         | 0.0547 | 0.0567 | 0.0021          | 0.0020  | 0.0019  | 1.2111                        | 1.1999 | 1.1860 |

|     |                       |        |        |        |        |        |        |         |         |         |        |        |        |
|-----|-----------------------|--------|--------|--------|--------|--------|--------|---------|---------|---------|--------|--------|--------|
| 34. | H <sub>2</sub> O-LiF  | 0.0250 | 0.0257 | 0.0256 | 0.1902 | 0.1861 | 0.1900 | 0.0090  | 0.0087  | 0.0089  | 1.3054 | 1.3005 | 1.3009 |
| 35. | H <sub>3</sub> N-LiF  | 0.0253 | 0.0259 | 0.0259 | 0.1544 | 0.1491 | 0.1521 | 0.0060  | 0.0056  | 0.0057  | 1.2239 | 1.2150 | 1.2148 |
| 36. | He <sub>2</sub>       | 0.0003 | 0.0004 | 0.0004 | 0.0022 | 0.0023 | 0.0023 | 0.0002  | 0.0002  | 0.0002  | 1.7650 | 1.7636 | 1.7593 |
| 37. | Ne <sub>2</sub>       | 0.0017 | 0.0019 | 0.0017 | 0.0144 | 0.0143 | 0.0144 | 0.0010  | 0.0010  | 0.0010  | 1.6648 | 1.6568 | 1.6793 |
| 38. | Ar <sub>2</sub>       | 0.0015 | 0.0016 | 0.0016 | 0.0058 | 0.0058 | 0.0059 | 0.0004  | 0.0004  | 0.0004  | 1.6533 | 1.6377 | 1.6184 |
| 39. | Propane <sub>2</sub>  | 0.0040 | 0.0038 | 0.0039 | 0.0139 | 0.0122 | 0.0122 | 0.0006  | 0.0005  | 0.0005  | 1.2726 | 1.2743 | 1.2373 |
| 40. | DHB-Me                | 0.0169 | 0.0172 | 0.0169 | 0.0492 | 0.0472 | 0.0488 | 0.0013  | 0.0014  | 0.0015  | 1.1311 | 1.1602 | 1.1601 |
| 41. | DHB-Et                | 0.0172 | 0.0169 | 0.0166 | 0.0491 | 0.0464 | 0.0479 | 0.0013  | 0.0015  | 0.0015  | 1.1299 | 1.1673 | 1.1728 |
| 42. | HBeCHN(H)-Be(H)CHN(H) | 0.0593 | 0.0613 | 0.0606 | 0.3860 | 0.3644 | 0.3722 | -0.0007 | -0.0030 | -0.0021 | 0.9928 | 0.9691 | 0.9782 |
| 43. | FBeCHN(H)-Be(F)CHN(H) | 0.0583 | 0.0603 | 0.0594 | 0.3610 | 0.3377 | 0.3472 | -0.0020 | -0.0045 | -0.0032 | 0.9790 | 0.9521 | 0.9661 |

**Table S15:** The variation of the absolute value of kinetic energy density  $G(\mathbf{r})$  and potential energy density  $V(\mathbf{r})$  at a critical point for the covalent, ionic, and coordinate bonds, obtained at MP2/6-311++G\*\* level of theory. These all values are given in a.u.

| S. No.            | Covalent                                          | G(r)   | V(r)    |
|-------------------|---------------------------------------------------|--------|---------|
| 1.                | H <sub>2</sub>                                    | 0.0057 | -0.2801 |
| 2.                | N <sub>2</sub>                                    | 0.5571 | -1.6601 |
| 3.                | O <sub>2</sub>                                    | 0.4806 | -1.0988 |
| 4.                | Cl <sub>2</sub>                                   | 0.0639 | -0.1287 |
| 5.                | HF                                                | 0.0950 | -0.8989 |
| 6.                | HCl                                               | 0.0604 | -0.2985 |
| 7.                | FCI                                               | 0.1313 | -0.2468 |
| 8.                | BH <sub>3</sub>                                   | 0.1317 | -0.3267 |
| 9.                | NH <sub>3</sub>                                   | 0.0688 | -0.5198 |
| 10.               | CH <sub>4</sub>                                   | 0.0489 | -0.3254 |
| 11.               | H <sub>2</sub> O                                  | 0.0839 | -0.7972 |
| 12.               | PH <sub>3</sub>                                   | 0.1719 | -0.3283 |
| 13.               | H <sub>2</sub> S                                  | 0.0638 | -0.2962 |
| 14.               | BCl <sub>3</sub>                                  | 0.1479 | -0.2949 |
| 15.               | NCl <sub>3</sub>                                  | 0.0953 | -0.2133 |
| 16.               | OCl <sub>2</sub>                                  | 0.1138 | -0.2248 |
| 17.               | PCl <sub>3</sub>                                  | 0.0572 | -0.1640 |
| 18.               | SCl <sub>2</sub>                                  | 0.0568 | -0.1297 |
| 19.               | CCl <sub>4</sub>                                  | 0.0725 | -0.2064 |
| 20.               | C <sub>2</sub> H <sub>6</sub>                     | 0.0611 | -0.2612 |
| 21.               | C <sub>2</sub> H <sub>4</sub>                     | 0.1423 | -0.5285 |
| 22.               | C <sub>2</sub> H <sub>2</sub>                     | 0.2747 | -0.8225 |
| 23.               | CH <sub>3</sub> OH                                | 0.2391 | -0.5825 |
| 24.               | CH <sub>3</sub> SH                                | 0.0514 | -0.1768 |
| <b>Ionic</b>      |                                                   |        |         |
| 25.               | NaCl                                              | 0.0428 | -0.0381 |
| 26.               | LiH                                               | 0.0417 | -0.0418 |
| 27.               | NaH                                               | 0.0314 | -0.0300 |
| 25.               | KH                                                | 0.0210 | -0.0220 |
| 29.               | CaS                                               | 0.0616 | -0.0724 |
| 30.               | AlN                                               | 0.2279 | -0.2455 |
| 31.               | MgCl <sub>2</sub>                                 | 0.0753 | -0.0733 |
| 32.               | MgH <sub>2</sub>                                  | 0.0612 | -0.0638 |
| 33.               | CaH <sub>2</sub>                                  | 0.0359 | -0.0417 |
| <b>Coordinate</b> |                                                   |        |         |
| 34.               | NH <sub>3</sub> BH <sub>3</sub>                   | 0.1745 | -0.2295 |
| 35.               | NH <sub>3</sub> BF <sub>3</sub>                   | 0.1465 | -0.2243 |
| 36.               | PH <sub>3</sub> BH <sub>3</sub>                   | 0.1122 | -0.1940 |
| 37.               | PH <sub>3</sub> AlH <sub>3</sub>                  | 0.0290 | -0.0353 |
| 38.               | H <sub>2</sub> SBH <sub>3</sub>                   | 0.0983 | -0.1509 |
| 39.               | H <sub>2</sub> SAlH <sub>3</sub>                  | 0.0261 | -0.0304 |
| 40.               | CO-BH <sub>3</sub>                                | 0.2296 | -0.3185 |
| 41.               | (CH <sub>3</sub> )NH <sub>2</sub> BH <sub>3</sub> | 0.2296 | -0.3185 |
| 42.               | HFBH <sub>3</sub>                                 | 0.1830 | -0.2461 |



**Table S16:** The variation of kinetic energy density  $G(\mathbf{r})$  and potential energy density  $V(\mathbf{r})$  at a critical point for the non-covalent, obtained at MP2/6-311++G\*\* level of theory. These all values are given in a.u.

| S. No. | Non-covalent                                     | G(r)   | V(r)   | S. No. | Non-covalent                                      | G(r)   | V(r)    |
|--------|--------------------------------------------------|--------|--------|--------|---------------------------------------------------|--------|---------|
| 1.     | H <sub>2</sub> O-H <sub>2</sub> O                | 0.0205 | 0.0181 | 23.    | LiH-ClCF <sub>3</sub>                             | 0.0054 | -0.0045 |
| 2.     | NH <sub>3</sub> -NH <sub>3</sub>                 | 0.0107 | 0.0092 | 24.    | C <sub>2</sub> H <sub>4</sub> -CH <sub>3</sub> CN | 0.0022 | -0.0016 |
| 3.     | NH <sub>3</sub> NH <sub>4</sub> <sup>+</sup>     | 0.0289 | 0.0349 | 25.    | LiF-CH <sub>3</sub> F                             | 0.0096 | -0.0078 |
| 4.     | H <sub>2</sub> ONH <sub>4</sub> <sup>+</sup>     | 0.0427 | 0.0491 | 26.    | H <sub>2</sub> O-CH <sub>3</sub> OH               | 0.0060 | -0.0046 |
| 5.     | H <sub>2</sub> O-Li <sup>+</sup>                 | 0.0539 | 0.0414 | 27.    | FH <sub>2</sub> P-NH <sub>2</sub> F               | 0.0158 | -0.0160 |
| 6.     | NH <sub>3</sub> -Li <sup>+</sup>                 | 0.0429 | 0.0357 | 28.    | FH <sub>2</sub> P-NH <sub>2</sub> Me              | 0.0197 | -0.0222 |
| 7.     | C <sub>2</sub> H <sub>2</sub> HCN                | 0.0045 | 0.0033 | 29.    | F(Me)S-NH <sub>3</sub>                            | 0.0127 | -0.0121 |
| 8.     | C <sub>2</sub> H <sub>2</sub> HNC                | 0.0080 | 0.0057 | 30.    | OH(Me)S-NH <sub>3</sub>                           | 0.0062 | -0.0054 |
| 9.     | NH <sub>3</sub> -C <sub>2</sub> H <sub>4</sub>   | 0.0039 | 0.0031 | 31.    | CN(H <sub>3</sub> )Si-CN(H <sub>3</sub> )Si       | 0.0070 | -0.0063 |
| 10.    | CH <sub>4</sub> -Bz                              | 0.0041 | 0.0034 | 32.    | NC(H <sub>3</sub> )Si-NC(H <sub>3</sub> )Si       | 0.0065 | -0.0057 |
| 11.    | NH <sub>3</sub> -Bz                              | 0.0041 | 0.0034 | 33.    | C <sub>2</sub> H <sub>4</sub> -LiF                | 0.0122 | -0.0101 |
| 12.    | H <sub>2</sub> O-CNBz                            | 0.0049 | 0.0039 | 34.    | H <sub>2</sub> O-LiF                              | 0.0385 | -0.0295 |
| 13.    | Cl <sup>-</sup> -FBz                             | 0.0057 | 0.0045 | 35.    | H <sub>3</sub> N-LiF                              | 0.0326 | -0.0267 |
| 14.    | Li <sup>+</sup> -Bz                              | 0.0159 | 0.0140 | 36.    | He <sub>2</sub>                                   | 0.0004 | -0.0002 |
| 15.    | Bz-Bz                                            | 0.0031 | 0.0026 | 37.    | Ne <sub>2</sub>                                   | 0.0026 | -0.0015 |
| 16.    | Pyridine-Bz                                      | 0.0034 | 0.0028 | 38.    | Ar <sub>2</sub>                                   | 0.0010 | -0.0006 |
| 17.    | Li <sup>+</sup> C <sub>2</sub> H <sub>6</sub>    | 0.0260 | 0.0210 | 39.    | Propane <sub>2</sub>                              | 0.0029 | -0.0023 |
| 18.    | Li <sup>+</sup> -CH <sub>4</sub>                 | 0.0241 | 0.0193 | 40.    | DHB-Me                                            | 0.0110 | -0.0097 |
| 19.    | CH <sub>3</sub> NH <sub>2</sub> -I <sub>2</sub>  | 0.0266 | 0.0302 | 41.    | DHB-Et                                            | 0.0110 | -0.0098 |
| 20.    | (CH <sub>3</sub> ) <sub>3</sub> N-I <sub>2</sub> | 0.0316 | 0.0386 | 42.    | HBeCHN(H)-Be(H)CHN(H)                             | 0.0972 | -0.0979 |
| 21.    | C <sub>2</sub> H <sub>2</sub> -ClCN              | 0.0042 | 0.0030 | 43.    | FBeCHN(H)-Be(F)CHN(H)                             | 0.0922 | -0.0942 |
| 22.    | H <sub>3</sub> N-ClCN                            | 0.0100 | 0.0087 |        |                                                   |        |         |

**Table S17.** The SAPT interaction energy decomposes into electrostatics (elst), exchange (exch), induction (ind), and dispersion (disp) components. The subscript “resp” denotes that the orbital response of the perturbed system is taken into account. The superscripts refer to the orders of the interaction and Møller-Plesset fluctuation potential operators.

$$\begin{aligned}
 \text{SAPT0} \quad E_{\text{SAPT0}} &= E_{\text{elst}}^{(10)} + E_{\text{exch}}^{(10)} + E_{\text{ind,resp}}^{(20)} + E_{\text{exch-ind,resp}}^{(20)} + E_{\text{disp}}^{(20)} + E_{\text{exch-disp}}^{(20)} \\
 \text{SAPT2} \quad E_{\text{SAPT2}} &= E_{\text{SAPT0}} + E_{\text{elst,resp}}^{(12)} + E_{\text{exch}}^{(11)} + E_{\text{exch}}^{(12)} + {}^t E_{\text{ind}}^{(22)} + {}^t E_{\text{exch-ind}}^{(22)} \\
 \text{SAPT2+} \quad E_{\text{SAPT2+}} &= E_{\text{SAPT2}} + E_{\text{disp}}^{(21)} + E_{\text{disp}}^{(22)} \\
 \text{SAPT2+(3)} \quad E_{\text{SAPT2+(3)}} &= E_{\text{SAPT2+}} + E_{\text{elst,resp}}^{(13)} + E_{\text{disp}}^{(30)} \\
 \text{SAPT2+3} \quad E_{\text{SAPT2+3}} &= E_{\text{SAPT2+(3)}} + E_{\text{exch-disp}}^{(30)} + E_{\text{ind-disp}}^{(30)} + E_{\text{exch-ind-disp}}^{(30)}
 \end{aligned}$$

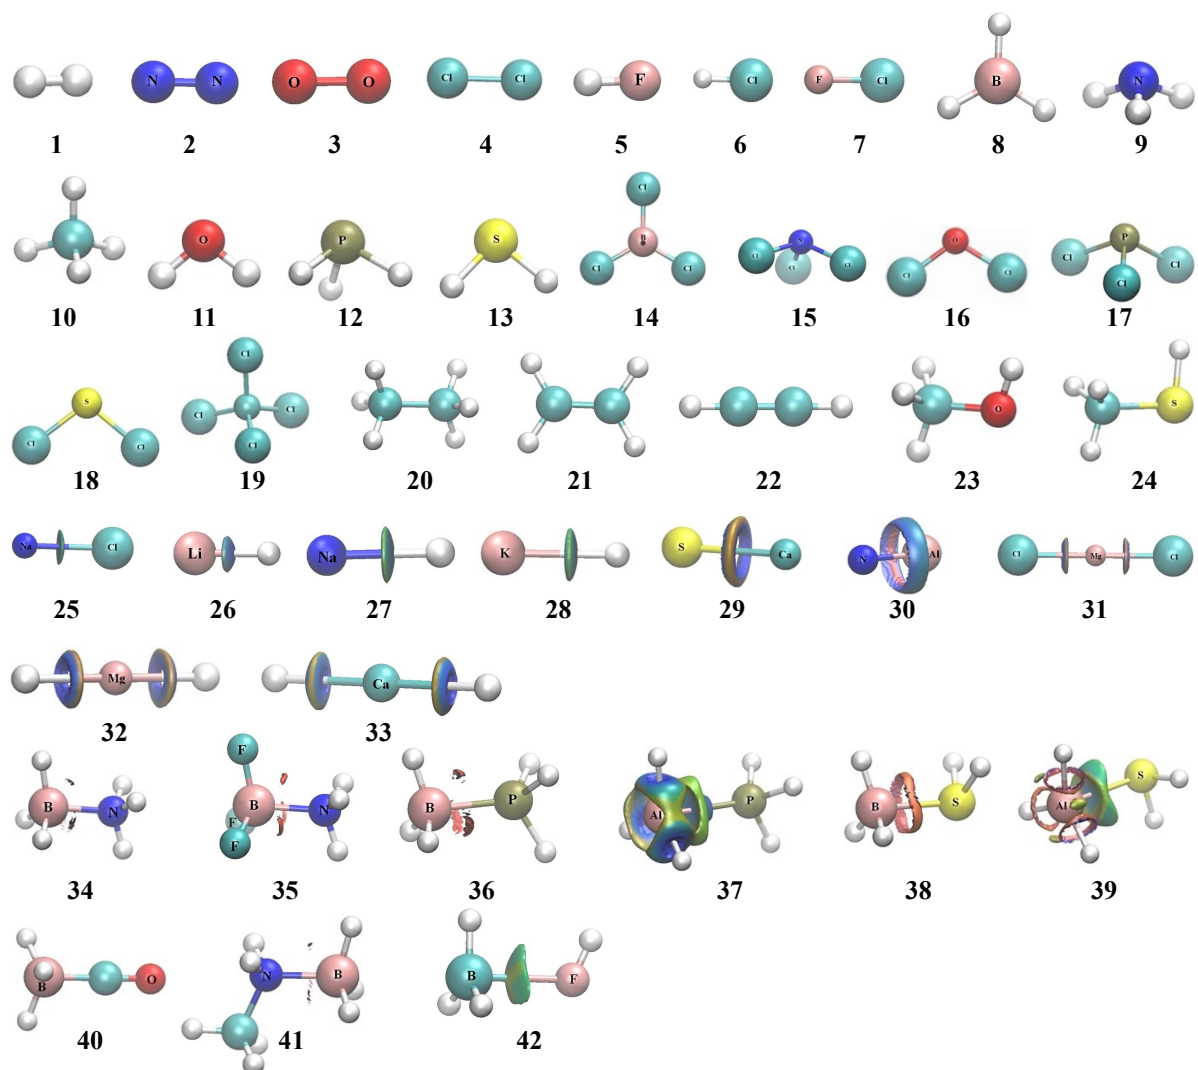

**Figure S1 (a):** NCI surfaces with  $s=0.5$  a.u. of the covalent (1-24), ionic (25-33), and coordinate (34-42) bonded systems.

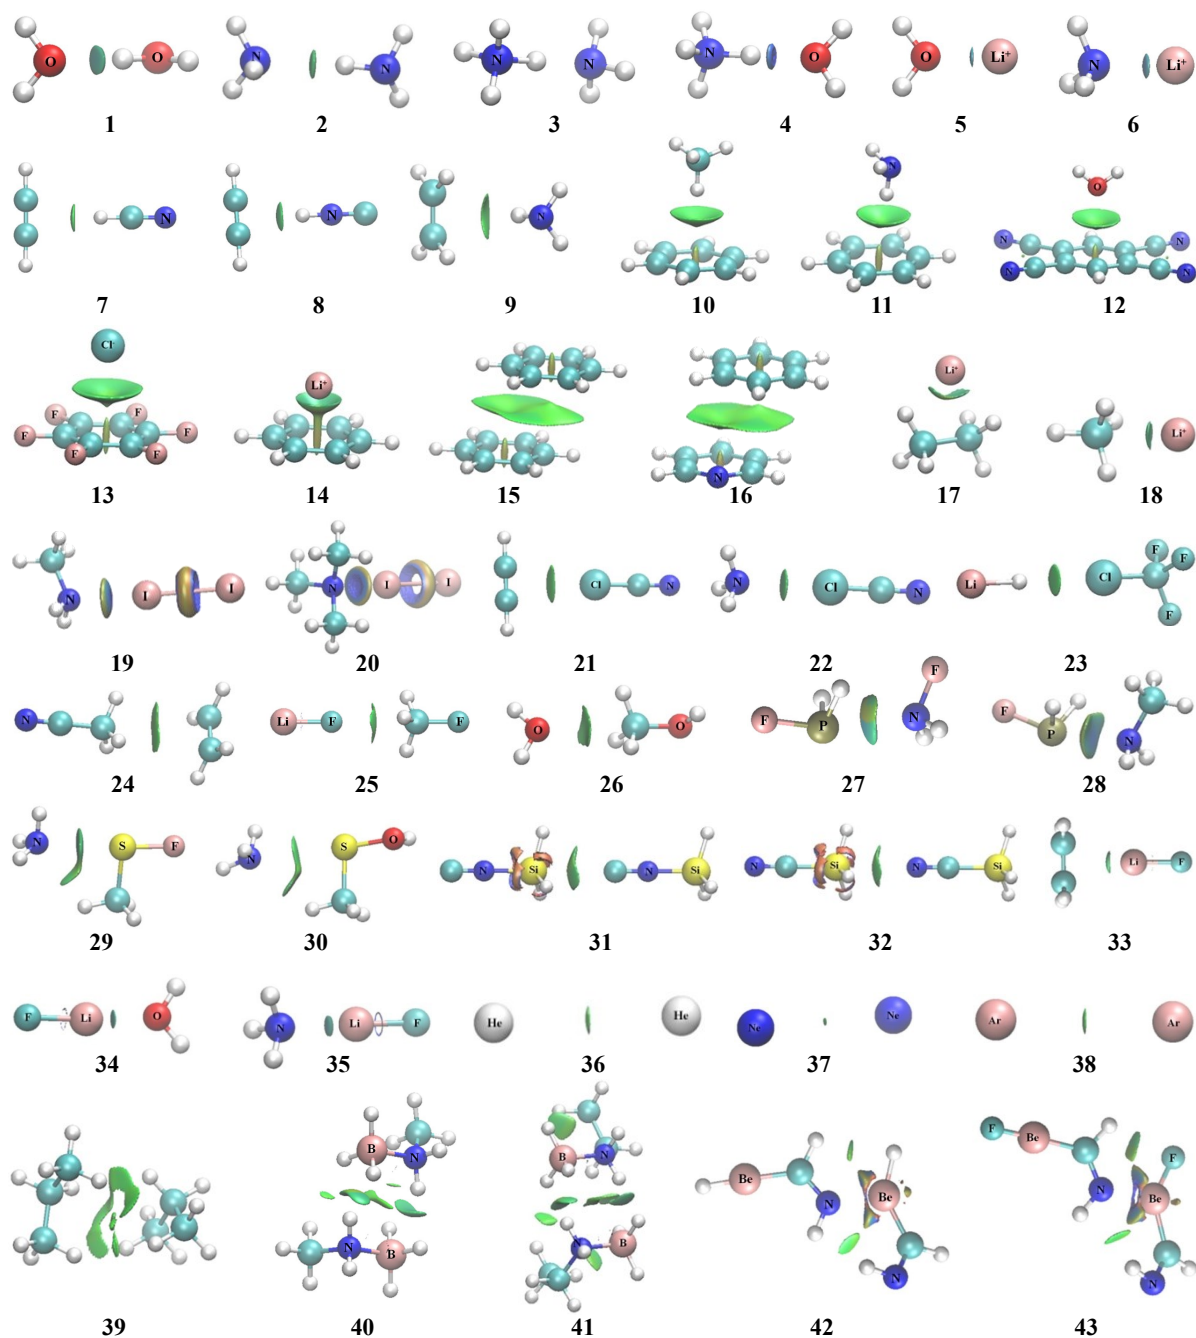

**Figure S1 (b):** NCI surfaces with  $s=0.5$  a.u. of the non-covalently bonded systems, namely HB (1-2), CHB (3-4), ML (5-6), XHP (7-11), LP (12), AP (13), CP (14), PP (15-16), CA (17-18), XB (19-22), HXB (23), CB (24-26), PB (27-28), CGB (29-30), TB (31-32), LB (33-35), VDW (36-38), HHB (39), DHB (40-41), and BB (42-43).

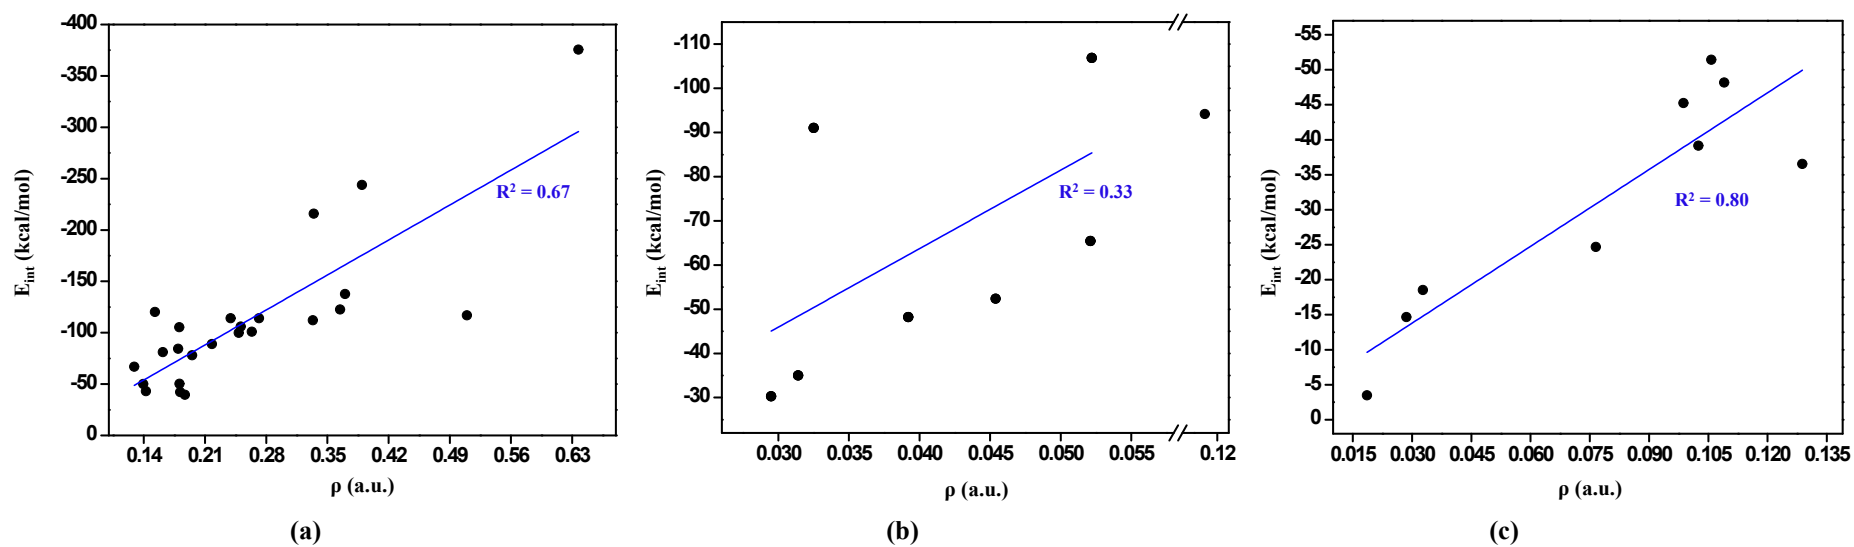

**Figure S2:** Linear fitting of interaction energy with electron density at a critical point for (a) covalent, (b) ionic, and (c) coordinate bonds. Values are calculated at MP2/6-311++G\*\* level of theory.
